# Supplementary material for: Extensive Phylogenetic Analysis of Piscine Orthoreovirus Genomic Sequences Shows the Robustness of Subgenotype Classification
Source: MDPI journal article supplement (doi:10.3390/pathogens10010041), 2021-01-07
Supplement: s1 [file s1]

## PRV\_metadata

Supplementary Table S2. GenBank accession numbers and metadata of PRV segments S1 and M2 sequences listed under the Tax ID: btd1157337 in the NCBI GenBank database to date (May 2020) used in this study

| GenBank Accession Number | PRV isolate       | PRV subgenotype (Kibenge et al., 2013; Godoy et al., 2016) | PRV subtype (Dhamolaran et al., 2018) | PRV Description                                                                                            | Country | Collection_date (Year) | Host                 | Primary Author |
|--------------------------|-------------------|------------------------------------------------------------|---------------------------------------|------------------------------------------------------------------------------------------------------------|---------|------------------------|----------------------|----------------|
| AF059720                 | OUTGROUP          |                                                            |                                       | Avian orthoreovirus strain 176 segment S3 major outer capsid                                               | Canada  | 1999                   | Avian                | Duncan         |
| GU994016                 | Salmo/GP-2010/NOR | lb                                                         | PRV1                                  | Reovirus sp. Salmo/GP-2010/NOR segment M2, partial sequence                                                | Norway  | 2010                   | Salmo salar          | Palacios       |
| GU994022                 | Salmo/GP-2010/NOR | lb                                                         | PRV1                                  | Reovirus sp. Salmo/GP-2010/NOR segment S1, partial sequence                                                | Norway  | 2010                   | Salmo salar          | Palacios       |
| HG329842                 | 35 Bjørre         | la                                                         | PRV1                                  | Piscine reovirus partial mRNA for Sigma 3, segment S1, isolate 35 Bjørre 2009 Wild                         | Norway  | 2009                   | Salmo salar          | Garseth        |
| HG329843                 | 45 Eira           | lb                                                         | PRV1                                  | Piscine reovirus partial mRNA for Sigma 3, segment S1, isolate 45 Eira 2009 Hatchery-reared                | Norway  | 2009                   | Salmo salar          | Garseth        |
| HG329844                 | 61 Eira           | lb                                                         | PRV1                                  | Piscine reovirus partial mRNA for Sigma 3, segment S1, isolate 61 Eira 2009 Hatchery-reared                | Norway  | 2009                   | Salmo salar          | Garseth        |
| HG329845                 | 81 Etne           | lb                                                         | PRV1                                  | Piscine reovirus partial mRNA for Sigma 3, segment S1, isolate 81 Etne 2009 Wild                           | Norway  | 2009                   | Salmo salar          | Garseth        |
| HG329846                 | 90 Etne           | lb                                                         | PRV1                                  | Piscine reovirus partial mRNA for Sigma 3, segment S1, isolate 90 Etne 2009 Wild                           | Norway  | 2009                   | Salmo salar          | Garseth        |
| HG329847                 | 93 Etne           | lb                                                         | PRV1                                  | Piscine reovirus partial mRNA for Sigma 3, segment S1, isolate 93 Etne 2009 Wild                           | Norway  | 2009                   | Salmo salar          | Garseth        |
| HG329848                 | 131 Gaula         | la                                                         | PRV1                                  | Piscine reovirus partial mRNA for Sigma 3, segment S1, isolate 131 Gaula 2009 Wild                         | Norway  | 2009                   | Salmo salar          | Garseth        |
| HG329849                 | 182 Hestdal       | la                                                         | PRV1                                  | Piscine reovirus partial mRNA for Sigma 3, segment S1, isolate 182 Hestdal 2009 Wild                       | Norway  | 2009                   | Salmo salar          | Garseth        |
| HG329850                 | 187 Hestdal       | la                                                         | PRV1                                  | Piscine reovirus partial mRNA for Sigma 3, segment S1, isolate 187 Hestdal 2009 Wild                       | Norway  | 2009                   | Salmo salar          | Garseth        |
| HG329851                 | 190 Hestdal       | la                                                         | PRV1                                  | Piscine reovirus partial mRNA for Sigma 3, segment S1, isolate 190 Hestdal 2009 Wild                       | Norway  | 2009                   | Salmo salar          | Garseth        |
| HG329852                 | 211 Mandal        | lb                                                         | PRV1                                  | Piscine reovirus partial mRNA for Sigma 3, segment S1, isolate 211 Mandal 2009 Wild                        | Norway  | 2009                   | Salmo salar          | Garseth        |
| HG329853                 | 220 Mandal        | lb                                                         | PRV1                                  | Piscine reovirus partial mRNA for Sigma 3, segment S1, isolate 220 Mandal 2009 Wild                        | Norway  | 2009                   | Salmo salar          | Garseth        |
| HG329854                 | 246 Mandal        | la                                                         | PRV1                                  | Piscine reovirus partial mRNA for Sigma 3, segment S1, isolate 246 Mandal 2009 Wild                        | Norway  | 2009                   | Salmo salar          | Garseth        |
| HG329855                 | 261 Nidelv        | lb                                                         | PRV1                                  | Piscine reovirus partial mRNA for Sigma 3, segment S1, isolate 261 Nidelv 2009 Escaped farmed              | Norway  | 2009                   | Salmo salar          | Garseth        |
| HG329856                 | 273 Skibotn       | lb                                                         | PRV1                                  | Piscine reovirus partial mRNA for Sigma 3, segment S1, isolate 273 Skibotn 2009 Wild                       | Norway  | 2009                   | Salmo salar          | Garseth        |
| HG329857                 | 283 Skjpmen       | lb                                                         | PRV1                                  | Piscine reovirus partial mRNA for Sigma 3, segment S1, isolate 283 Skjpmen 2009 Escaped farmed             | Norway  | 2009                   | Salmo salar          | Garseth        |
| HG329858                 | 284 Stjoldal      | la                                                         | PRV1                                  | Piscine reovirus partial mRNA for Sigma 3, segment S1, isolate 284 Stjoldal 2009 Wild                      | Norway  | 2009                   | Salmo salar          | Garseth        |
| HG329859                 | 307 Stjoldal      | la                                                         | PRV1                                  | Piscine reovirus partial mRNA for Sigma 3, segment S1, isolate 307 Stjoldal 2009 Wild                      | Norway  | 2009                   | Salmo salar          | Garseth        |
| HG329860                 | 318 Storelva Holt | lb                                                         | PRV1                                  | Piscine reovirus partial mRNA for Sigma 3, segment S1, isolate 318 Storelva Holt 2009 Wild                 | Norway  | 2009                   | Salmo salar          | Garseth        |
| HG329861                 | 338 Surna         | lb                                                         | PRV1                                  | Piscine reovirus partial mRNA for Sigma 3, segment S1, isolate 338 Surna 2009 Escaped farmed               | Norway  | 2009                   | Salmo salar          | Garseth        |
| HG329862                 | 350 Surna         | lb                                                         | PRV1                                  | Piscine reovirus partial mRNA for Sigma 3, segment S1, isolate 350 Surna 2009 Escaped farmed               | Norway  | 2009                   | Salmo salar          | Garseth        |
| HG329863                 | 407 Vosso         | la                                                         | PRV1                                  | Piscine reovirus partial mRNA for Sigma 3, segment S1, isolate 407 Vosso 2009 Wild                         | Norway  | 2009                   | Salmo salar          | Garseth        |
| HG329864                 | 411 Vosso         | lb                                                         | PRV1                                  | Piscine reovirus partial mRNA for Sigma 3, segment S1, isolate 411 Vosso 2009 Wild                         | Norway  | 2009                   | Salmo salar          | Garseth        |
| HG329865                 | 412 Vosso         | lb                                                         | PRV1                                  | Piscine reovirus partial mRNA for Sigma 3, segment S1, isolate 412 Vosso 2009 Hatchery-reared              | Norway  | 2009                   | Salmo salar          | Garseth        |
| HG329866                 | 414 Vosso         | lb                                                         | PRV1                                  | Piscine reovirus partial mRNA for Sigma 3, segment S1, isolate 414 Vosso 2009 Hatchery-reared              | Norway  | 2009                   | Salmo salar          | Garseth        |
| HG329867                 | 438 Alta          | lb                                                         | PRV1                                  | Piscine reovirus partial mRNA for Sigma 3, segment S1, isolate 438 Alta 2008 Wild                          | Norway  | 2008                   | Salmo salar          | Garseth        |
| HG329868                 | 445 Alta          | la                                                         | PRV1                                  | Piscine reovirus partial mRNA for Sigma 3, segment S1, isolate 445 Alta 2008 Wild                          | Norway  | 2008                   | Salmo salar          | Garseth        |
| HG329869                 | 470 Dreva         | lb                                                         | PRV1                                  | Piscine reovirus partial mRNA for Sigma 3, segment S1, isolate 470 Dreva 2008 Wild                         | Norway  | 2008                   | Salmo salar          | Garseth        |
| HG329870                 | 491 Eira          | lb                                                         | PRV1                                  | Piscine reovirus partial mRNA for Sigma 3, segment S1, isolate 491 Eira 2008 Wild                          | Norway  | 2008                   | Salmo salar          | Garseth        |
| HG329871                 | 517 Eira          | la                                                         | PRV1                                  | Piscine reovirus partial mRNA for Sigma 3, segment S1, isolate 517 Eira 2008 Wild                          | Norway  | 2008                   | Salmo salar          | Garseth        |
| HG329872                 | 522 Ekso          | lb                                                         | PRV1                                  | Piscine reovirus partial mRNA for Sigma 3, segment S1, isolate 522 Ekso 2008 Wild                          | Norway  | 2008                   | Salmo salar          | Garseth        |
| HG329873                 | 555 Fusta         | lb                                                         | PRV1                                  | Piscine reovirus partial mRNA for Sigma 3, segment S1, isolate 555 Fusta 2008 Wild                         | Norway  | 2008                   | Salmo salar          | Garseth        |
| HG329874                 | 555 Gaula         | lb                                                         | PRV1                                  | Piscine reovirus partial mRNA for Sigma 3, segment S1, isolate 555 Gaula 2008 Wild                         | Norway  | 2008                   | Salmo salar          | Garseth        |
| HG329875                 | 629 Jostna        | lb                                                         | PRV1                                  | Piscine reovirus partial mRNA for Sigma 3, segment S1, isolate 629 Jostna 2008 Wild                        | Norway  | 2008                   | Salmo salar          | Garseth        |
| HG329876                 | 708 Nausta        | la                                                         | PRV1                                  | Piscine reovirus partial mRNA for Sigma 3, segment S1, isolate 708 Nausta 2008 Wild                        | Norway  | 2008                   | Salmo salar          | Garseth        |
| HG329877                 | 818 Surna         | lb                                                         | PRV1                                  | Piscine reovirus partial mRNA for Sigma 3, segment S1, isolate 818 Surna 2008 Wild                         | Norway  | 2008                   | Salmo salar          | Garseth        |
| HG329878                 | 842 Vjika         | la                                                         | PRV1                                  | Piscine reovirus partial mRNA for Sigma 3, segment S1, isolate 842 Vjika 2008 Wild                         | Norway  | 2008                   | Salmo salar          | Garseth        |
| HG329879                 | 851 Vjika         | la                                                         | PRV1                                  | Piscine reovirus partial mRNA for Sigma 3, segment S1, isolate 851 Vjika 2008 Wild                         | Norway  | 2008                   | Salmo salar          | Garseth        |
| HG329880                 | 866 Vjika         | la                                                         | PRV1                                  | Piscine reovirus partial mRNA for Sigma 3, segment S1, isolate 866 Vjika 2008 Wild                         | Norway  | 2008                   | Salmo salar          | Garseth        |
| HG329881                 | 907 Vosso         | la                                                         | PRV1                                  | Piscine reovirus partial mRNA for Sigma 3, segment S1, isolate 907 Vosso 2008 Hatchery-reared              | Norway  | 2008                   | Salmo salar          | Garseth        |
| HG329882                 | 909 Vosso         | la                                                         | PRV1                                  | Piscine reovirus partial mRNA for Sigma 3, segment S1, isolate 909 Vosso 2008 Hatchery-reared              | Norway  | 2008                   | Salmo salar          | Garseth        |
| HG329883                 | 931 Alta          | la                                                         | PRV1                                  | Piscine reovirus partial mRNA for Sigma 3, segment S1, isolate 931 Alta 2007 Wild                          | Norway  | 2007                   | Salmo salar          | Garseth        |
| HG329884                 | 982 Eira          | lb                                                         | PRV1                                  | Piscine reovirus partial mRNA for Sigma 3, segment S1, isolate 982 Eira 2007 Wild                          | Norway  | 2007                   | Salmo salar          | Garseth        |
| HG329885                 | 985 Ekso          | lb                                                         | PRV1                                  | Piscine reovirus partial mRNA for Sigma 3, segment S1, isolate 985 Ekso 2007 wild                          | Norway  | 2007                   | Salmo salar          | Garseth        |
| HG329886                 | 987 Ekso          | la                                                         | PRV1                                  | Piscine reovirus partial mRNA for Sigma 3, segment S1, isolate 987 Ekso 2007 wild                          | Norway  | 2007                   | Salmo salar          | Garseth        |
| HG329887                 | 989 Ekso          | la                                                         | PRV1                                  | Piscine reovirus partial mRNA for Sigma 3, segment S1, isolate 989 Ekso 2007 Wild                          | Norway  | 2007                   | Salmo salar          | Garseth        |
| HG329888                 | 993 Ekso          | la                                                         | PRV1                                  | Piscine reovirus partial mRNA for Sigma 3, segment S1, isolate 993 Ekso 2007 Wild                          | Norway  | 2007                   | Salmo salar          | Garseth        |
| HG329889                 | 1033 Laerdal      | la                                                         | PRV1                                  | Piscine reovirus partial mRNA for Sigma 3, segment S1, isolate 1033 Laerdal 2007 Wild                      | Norway  | 2007                   | Salmo salar          | Garseth        |
| HG329890                 | 1062 Mandal       | la                                                         | PRV1                                  | Piscine reovirus partial mRNA for Sigma 3, segment S1, isolate 1062 Mandal 2007 wild                       | Norway  | 2007                   | Salmo salar          | Garseth        |
| HG329891                 | 1137 Stjoldal     | la                                                         | PRV1                                  | Piscine reovirus partial mRNA for Sigma 3, segment S1, isolate 1137 Stjoldal 2007 Wild                     | Norway  | 2007                   | Salmo salar          | Garseth        |
| HG329892                 | 1160 Surna        | lb                                                         | PRV1                                  | Piscine reovirus partial mRNA for Sigma 3, segment S1, isolate 1160 Surna 2007 Wild                        | Norway  | 2007                   | Salmo salar          | Garseth        |
| HG329893                 | 1195 Aarøy        | lb                                                         | PRV1                                  | Piscine reovirus partial mRNA for Sigma 3, segment S1, isolate 1195 Aarøy 2007 Wild                        | Norway  | 2007                   | Salmo salar          | Garseth        |
| HG329894                 | 1261 Halsan       | lb                                                         | PRV1                                  | Piscine reovirus partial mRNA for Sigma 3, segment S1, isolate 1261 Halsan 2009 Escaped farmed             | Norway  | 2009                   | Salmo salar          | Garseth        |
| HG329895                 | 1309 Eidsdal      | lb                                                         | PRV1                                  | Piscine reovirus partial mRNA for Sigma 3, segment S1, isolate 1309 Eidsdal 2008 Wild                      | Norway  | 2008                   | Salmo salar          | Garseth        |
| HG329896                 | 1343 Moelv        | lb                                                         | PRV1                                  | Piscine reovirus partial mRNA for Sigma 3, segment S1, isolate 1343 Moelv 2008 Wild                        | Norway  | 2008                   | Salmo salar          | Garseth        |
| HG329897                 | 1361 Moelv        | lb                                                         | PRV1                                  | Piscine reovirus partial mRNA for Sigma 3, segment S1, isolate 1361 Moelv 2008 Sea-trout                   | Norway  | 2008                   | Salmo salar          | Garseth        |
| HG329898                 | 1450 Etne         | lb                                                         | PRV1                                  | Piscine reovirus partial mRNA for Sigma 3, segment S1, isolate 1450 Etne 2010 Escaped farmed               | Norway  | 2010                   | Salmo salar          | Garseth        |
| HG329899                 | 1462 Etne         | lb                                                         | PRV1                                  | Piscine reovirus partial mRNA for Sigma 3, segment S1, isolate 1462 Etne 2010 Escaped farmed               | Norway  | 2010                   | Salmo salar          | Garseth        |
| HG329900                 | 1463 Etne         | lb                                                         | PRV1                                  | Piscine reovirus partial mRNA for Sigma 3, segment S1, isolate 1463 Etne 2010 Escaped farmed               | Norway  | 2010                   | Salmo salar          | Garseth        |
| HG329901                 | 1469 Etne         | lb                                                         | PRV1                                  | Piscine reovirus partial mRNA for Sigma 3, segment S1, isolate 1469 Etne 2010 Escaped farmed               | Norway  | 2010                   | Salmo salar          | Garseth        |
| JN891006                 | 1433-S3           | lb                                                         | PRV1                                  | Piscine reovirus isolate 1433 sigma 3 protein gene, partial cds                                            | Norway  | 2010                   | Salmo salar          | Lovoll         |
| JN991007                 | 1921-S3           | lb                                                         | PRV1                                  | Piscine reovirus isolate 1921 sigma 3 protein gene, partial cds                                            | Norway  | 2010                   | Salmo salar          | Lovoll         |
| JN991008                 | 9326-S3           | la                                                         | PRV1                                  | Piscine reovirus isolate 9326 sigma 3 protein gene, partial cds                                            | Norway  | 2010                   | Salmo salar          | Lovoll         |
| JN991009                 | 7243-S3           | lb                                                         | PRV1                                  | Piscine reovirus isolate 7243 sigma 3 protein gene, partial cds                                            | Norway  | 2010                   | Salmo salar          | Lovoll         |
| JN991010                 | 7030-S3           | lb                                                         | PRV1                                  | Piscine reovirus isolate 7030 sigma 3 protein gene, partial cds                                            | Norway  | 2010                   | Salmo salar          | Lovoll         |
| JN991011                 | 8286-S3           | lb                                                         | PRV1                                  | Piscine reovirus isolate 8286 sigma 3 protein gene, partial cds                                            | Norway  | 2010                   | Salmo salar          | Lovoll         |
| JN991012                 | 3817-S3           | la                                                         | PRV1                                  | Piscine reovirus isolate 3817 sigma 3 protein gene, partial cds                                            | Norway  | 2010                   | Salmo salar          | Lovoll         |
| JX046542                 | PRV-M2-R11/11     | unknown                                                    | unknown                               | Piscine reovirus isolate PRV-M2-R11/11 outer capsid protein [M2] gene, partial cds                         | Norway  | 2011                   | Salmo salar          | Tolaas         |
| JX046543                 | PRV-M2-R12/11     | unknown                                                    | unknown                               | Piscine reovirus isolate PRV-M2-R12/11 outer capsid protein [M2] gene, partial cds                         | Norway  | 2011                   | Salmo salar          | Tolaas         |
| KC473452                 | VT02292012-163    | la                                                         | PRV1                                  | Piscine reovirus isolate VT02292012-163 sigma 1 and sigma 15 genes, complete cds                           | Canada  | 2012                   | Salmo salar          | Kibenge        |
| KC473453                 | VT06020212-358    | la                                                         | PRV1                                  | Piscine reovirus isolate VT06020212-358 sigma 1 and sigma 15 genes, complete cds                           | Canada  | 2012                   | Salmo salar          | Kibenge        |
| KC473454                 | VT06020212-371    | la                                                         | PRV1                                  | Piscine reovirus isolate VT06020212-371 sigma 1 and sigma 15 genes, complete cds                           | Canada  | 2012                   | Salmo salar          | Kibenge        |
| KC715683                 | VT06020212-358    | la                                                         | PRV1                                  | Piscine reovirus isolate VT06020212-358 outer shell protein mRNA, complete cds                             | Canada  | 2012                   | Salmo salar          | Kibenge        |
| KC776260                 | VT06020212-371    | la                                                         | PRV1                                  | Piscine reovirus isolate VT06020212-371 outer shell protein mRNA, complete cds                             | Canada  | 2012                   | Salmo salar          | Kibenge        |
| KC776261                 | CGA337            | lb                                                         | PRV1                                  | UNVERIFIED, Piscine reovirus isolate CGA337/2012 sigma 3-like gene, partial sequence                       | Chile   | 2012                   | Salmo salar          | Kibenge        |
| KC790988                 | CGA8857           | lb                                                         | PRV1                                  | UNVERIFIED, Piscine reovirus isolate CGA8857/2012 sigma 3-like gene, partial sequence                      | Chile   | 2012                   | Salmo salar          | Kibenge        |
| KC795569                 | CGA280-05         | lb                                                         | PRV1                                  | Piscine reovirus isolate CGA280-05 outer shell protein mRNA, complete cds                                  | Chile   | 2012                   | Salmo salar          | Kibenge        |
| KC795571                 | CGA280-05         | lb                                                         | PRV1                                  | Piscine reovirus isolate CGA280-05 outer clamp protein and non-structural protein genes, complete cds      | Chile   | 2012                   | Salmo salar          | Kibenge        |
| KC795583                 | VT02292012-163    | la                                                         | PRV1                                  | Piscine reovirus isolate VT02292012-163 outer shell protein mRNA, partial cds                              | Canada  | 2012                   | Salmo salar          | Kibenge        |
| KC795584                 | VT02292012-167    | la                                                         | PRV1                                  | Piscine reovirus isolate VT02292012-167 outer shell protein mRNA, partial cds                              | Canada  | 2012                   | Salmo salar          | Kibenge        |
| KC795599                 | VT02292012-167    | la                                                         | PRV1                                  | Piscine reovirus isolate VT02292012-167 outer clamp protein and non-structural protein genes, complete cds | Canada  | 2012                   | Salmo salar          | Kibenge        |
| KC795600                 | VT03202012-196    | la                                                         | PRV1                                  | Piscine reovirus isolate VT03202012-196 outer clamp protein and non-structural protein genes, complete cds | Canada  | 2012                   | Salmo salar          | Kibenge        |
| KC795601                 | VT03202012-209    | la                                                         | PRV1                                  | Piscine reovirus isolate VT03202012-209 outer clamp protein and non-structural protein genes, complete cds | Canada  | 2012                   | Salmo salar          | Kibenge        |
| KR347477                 | 50607             | lb                                                         | PRV1                                  | Piscine reovirus isolate 50607 segment M2 no 1 protein gene, complete cds                                  | Norway  | 2007                   | Salmo salar          | Haavset        |
| KR347479                 | 50607             | lb                                                         | PRV1                                  | Piscine reovirus isolate 050607 segment S1 sigma 3 protein and p13 protein genes, complete cds             | Norway  | 2007                   | Salmo salar          | Haavset        |
| KR347078                 | BCA1849_01        | la                                                         | PRV1                                  | Piscine reovirus isolate BCA1849_01 sigma 3 gene, partial cds; and protein p13 gene, complete cds          | Canada  | 2001                   | Salmo salar          | Sliah          |
| KR347079                 | BCA1850_01        | la                                                         | PRV1                                  | Piscine reovirus isolate BCA1850_01 sigma 3 gene, partial cds; and protein p13 gene, complete cds          | Canada  | 2001                   | Salmo salar          | Sliah          |
| KR347080                 | BCA1854_05        | la                                                         | PRV1                                  | Piscine reovirus isolate BCA1854_05 sigma 3 gene, partial cds; and protein p13 gene, complete cds          | Canada  | 2005                   | Salmo salar          | Sliah          |
| KR347081                 | BCJ19824_13       | la                                                         | PRV1                                  | Piscine reovirus isolate BCJ19824_13 sigma 3 gene, partial cds; and protein p13 gene, complete cds         | Canada  | 2013                   | Oncorhynchus kisutch | Sliah          |
| KR347082                 | BCJ19323_13       | la                                                         | PRV1                                  | Piscine reovirus isolate BCJ19323_13 sigma 3 gene, partial cds; and protein p13 gene, complete cds         | Canada  | 2013                   | Oncorhynchus kisutch | Sliah          |
| KR347083                 | BCJ19943_13       | la                                                         | PRV1                                  | Piscine reovirus isolate BCJ19943_13 sigma 3 gene, partial cds; and protein p13 gene, complete cds         | Canada  | 2013                   | Oncorhynchus kisutch | Sliah          |
| KR347084                 | BCJ24201_13       | la                                                         | PRV1                                  | Piscine reovirus isolate BCJ24201_13 sigma 3 gene, partial cds; and protein p13 gene, complete cds         | Canada  | 2013                   | Salmo salar          | Sliah          |
| KR347085                 | BCJ28529_13       | la                                                         | PRV1                                  | Piscine reovirus isolate BCJ28529_13 sigma 3 gene, partial cds; and protein p13 gene, complete cds         | Canada  | 2013                   | Salmo salar          | Sliah          |
| KR347086                 | BCJ28537_13       | la                                                         | PRV1                                  | Piscine reovirus isolate BCJ28537_13 sigma 3 gene, partial cds; and protein p13 gene, complete cds         | Canada  | 2013                   | Salmo salar          | Sliah          |
| KR347087                 | BCJ28545_13       | la                                                         | PRV1                                  | Piscine reovirus isolate BCJ28545_13 sigma 3 gene, partial cds; and protein p13 gene, complete cds         | Canada  | 2013                   | Salmo salar          | Sliah          |
| KR347088                 | BCJ31910_13       | la                                                         | PRV1                                  | Piscine reovirus isolate BCJ31910_13 sigma 3 gene, partial cds; and protein p13 gene, complete cds         | Canada  | 2013                   | Salmo salar          | Sliah          |
| KR347089                 | BCJ31914_13       | la                                                         | PRV1                                  | Piscine reovirus isolate BCJ31914_13 sigma 3 gene, partial cds; and protein p13 gene, complete cds         | Canada  | 2013                   | Salmo salar          | Sliah          |
| KR347090                 | BCJ31915_13       | la                                                         | PRV1                                  | Piscine reovirus isolate BCJ31915_13 sigma 3 gene, partial cds; and protein p13 gene, complete cds         | Canada  | 2013                   | Salmo salar          | Sliah          |
| KR347091                 | BCJ31916_13       | la                                                         | PRV1                                  | Piscine reovirus isolate BCJ31916_13 sigma 3 gene, partial cds; and protein p13 gene, complete cds         | Canada  | 2013                   | Salmo salar          | Sliah          |
| KR347092                 | BCJ31920_13       | la                                                         | PRV1                                  | Piscine reovirus isolate BCJ31920_13 sigma 3 gene, partial cds; and protein p13 gene, complete cds         | Canada  | 2013                   | Salmo salar          | Sliah          |
| KR347093                 | BCJ34056_13       | la                                                         | PRV1                                  | Piscine reovirus isolate BCJ34056_13 sigma 3 gene, partial cds; and protein p13 gene, complete cds         | Canada  | 2013                   | Oncorhynchus kisutch | Sliah          |
| KR347094                 | BCJ35240_13       | la                                                         | PRV1                                  | Piscine reovirus isolate BCJ35240_13 sigma 3 gene, partial cds; and protein p13 gene, complete cds         | Canada  | 2013                   | Salmo salar          | Sliah          |
| KR347095                 | BCJ35246_13       | la                                                         | PRV1                                  | Piscine reovirus isolate BCJ35246_13 sigma 3 gene, partial cds; and protein p13 gene, complete cds         | Canada  | 2013                   | Salmo salar          | Sliah          |
| KR347096                 | BCJ35249_13       | la                                                         | PRV1                                  | Piscine reovirus isolate BCJ35249_13 sigma 3 gene, partial cds; and protein p13 gene, complete cds         | Canada  | 2013                   | Salmo salar          | Sliah          |
| KR347097                 | BCJ35255_13       | la                                                         | PRV1                                  | Piscine reovirus isolate BCJ35255_13 sigma 3 gene, partial cds; and protein p13 gene, complete cds         | Canada  | 2013                   | Salmo salar          | Sliah          |
| KR347098                 | BCJ35256_13       | la                                                         | PRV1                                  | Piscine reovirus isolate BCJ35256_13 sigma 3 gene, partial cds; and protein p13 gene, complete cds         | Canada  | 2013                   | Salmo salar          | Sliah          |
| KR347099                 | BCJ37696_13       | la                                                         | PRV1                                  | Piscine reovirus isolate BCJ37696_13 sigma 3 gene, partial cds; and protein p13 gene, complete cds         | Canada  | 2013                   | Oncorhynchus kisutch | Sliah          |
| KR347100                 | BCJ40723_13       | la                                                         | PRV1                                  | Piscine reovirus isolate BCJ40723_13 sigma 3 gene, partial cds; and protein p13 gene, complete cds         | Canada  | 2013                   | Salmo salar          | Sliah          |
| KR347101                 | BCJ40731_13       | la                                                         | PRV1                                  | Piscine reov                                                                                               |         |                        |                      |                |



## PRV\_metadata

|          |                    |     |       |                                                                                                         |        |      |                                 |             |
|----------|--------------------|-----|-------|---------------------------------------------------------------------------------------------------------|--------|------|---------------------------------|-------------|
| KU160515 | VT07222015-107     | la  | PRV/1 | Piscine reovirus isolate VT07222015-107 segment S1 outer clamp protein and p13 protein genes. complete  | Canada | 2015 | <i>Salmo salar</i>              | Kibenge     |
| KX844951 | C10/P4.1           | ila | PRV/3 | Piscine reovirus isolate C10/P4.1 sigma 3 protein (OCP/Sigma3) gene. complete cds                       | Chile  | 2014 | <i>Oncorhynchus mykiss</i>      | Cartagena   |
| KX844952 | IM/P5.2            | ila | PRV/1 | Piscine reovirus isolate IM/P5.2 sigma 3 protein (OCP/Sigma3) gene. complete cds                        | Chile  | 2014 | <i>Oncorhynchus mykiss</i>      | Cartagena   |
| KX844953 | VP/3.2             | ila | PRV/1 | Piscine reovirus isolate VP/3.2 sigma 3 protein (OCP/Sigma3) gene. complete cds                         | Chile  | 2014 | <i>Oncorhynchus mykiss</i>      | Cartagena   |
| KX844954 | VP/3.1             | ila | PRV/1 | Piscine reovirus isolate VP/3.1 sigma 3 protein (OCP/Sigma3) gene. complete cds                         | Chile  | 2014 | <i>Oncorhynchus mykiss</i>      | Cartagena   |
| KX844955 | VP/2.2             | ila | PRV/1 | Piscine reovirus isolate VP/2.2 sigma 3 protein (OCP/Sigma3) gene. complete cds                         | Chile  | 2014 | <i>Oncorhynchus mykiss</i>      | Cartagena   |
| KX844956 | VP/2.1             | ila | PRV/1 | Piscine reovirus isolate VP/2.1 sigma 3 protein (OCP/Sigma3) gene. complete cds                         | Chile  | 2014 | <i>Oncorhynchus mykiss</i>      | Cartagena   |
| KX844957 | VP/1.2             | ila | PRV/1 | Piscine reovirus isolate VP/1.2 sigma 3 protein (OCP/Sigma3) gene. complete cds                         | Chile  | 2014 | <i>Oncorhynchus mykiss</i>      | Cartagena   |
| KX844958 | VP/1.1             | ila | PRV/1 | Piscine reovirus isolate VP/1.1 sigma 3 protein (OCP/Sigma3) gene. complete cds                         | Chile  | 2014 | <i>Oncorhynchus mykiss</i>      | Cartagena   |
| KX844959 | C10/P4.2           | ila | PRV/3 | Piscine reovirus isolate C10/P4.2 sigma 3 protein (OCP/Sigma3) gene. complete cds                       | Chile  | 2014 | <i>Oncorhynchus mykiss</i>      | Cartagena   |
| KX844960 | C10/P3.2           | ila | PRV/3 | Piscine reovirus isolate C10/P3.2 sigma 3 protein (OCP/Sigma3) gene. complete cds                       | Chile  | 2014 | <i>Oncorhynchus mykiss</i>      | Cartagena   |
| KX844961 | C10/P3.1           | ila | PRV/3 | Piscine reovirus isolate C10/P3.1 sigma 3 protein (OCP/Sigma3) gene. complete cds                       | Chile  | 2014 | <i>Oncorhynchus mykiss</i>      | Cartagena   |
| KX844962 | C10/P2.2           | ila | PRV/3 | Piscine reovirus isolate C10/P2.2 sigma 3 protein (OCP/Sigma3) gene. complete cds                       | Chile  | 2014 | <i>Oncorhynchus mykiss</i>      | Cartagena   |
| KX844963 | C10/P2.1           | ila | PRV/3 | UNVERIFIED: Piscine reovirus isolate C10/P2.1 sigma 3 protein-like (OCP/Sigma3) gene. complete sequence | Chile  | 2014 | <i>Oncorhynchus mykiss</i>      | Cartagena   |
| KX844964 | C10/P1.2           | ila | PRV/3 | Piscine reovirus isolate C10/P1.2 sigma 3 protein (OCP/Sigma3) gene. complete cds                       | Chile  | 2014 | <i>Oncorhynchus mykiss</i>      | Cartagena   |
| KX844965 | C10/P1.1           | ila | PRV/3 | Piscine reovirus isolate C10/P1.1 sigma 3 protein (OCP/Sigma3) gene. complete cds                       | Chile  | 2014 | <i>Oncorhynchus mykiss</i>      | Cartagena   |
| KX851970 | B5690              | ila | PRV/1 | dump description                                                                                        | Canada | 2013 | <i>Salmo salar</i>              | Di Cicco    |
| KX851971 | B7274              | ila | PRV/1 | dump description                                                                                        | Canada | 2013 | <i>Salmo salar</i>              | Di Cicco    |
| KX851974 | B7274              | ila | PRV/1 | Piscine reovirus isolate B7274 segment M2, complete sequence                                            | Canada | 2013 | <i>Salmo salar</i>              | Di Cicco    |
| KX851975 | B5690              | ila | PRV/1 | Piscine reovirus isolate B5690 segment M2, complete sequence                                            | Canada | 2013 | <i>Salmo salar</i>              | Di Cicco    |
| KY369097 | 12-07_4            | ila | PRV/1 | Piscine orthoreovirus isolate 12-07_4 sigma 3 and p13 protein genes. partial cds                        | USA    | 2012 | <i>Oncorhynchus tshawytscha</i> | Purcell     |
| KY369098 | 12-09_1            | ila | PRV/1 | Piscine orthoreovirus isolate 12-09_1 sigma 3 and p13 protein genes. partial cds                        | USA    | 2012 | <i>Oncorhynchus tshawytscha</i> | Purcell     |
| KY369099 | 13-18_12           | ila | PRV/1 | Piscine orthoreovirus isolate 13-18_12 sigma 3 and p13 protein genes. partial cds                       | USA    | 2012 | <i>Oncorhynchus kisutch</i>     | Purcell     |
| KY369100 | 13-26_10           | ila | PRV/1 | Piscine orthoreovirus isolate 13-26_10 sigma 3 and p13 protein genes. partial cds                       | USA    | 2012 | <i>Oncorhynchus kisutch</i>     | Purcell     |
| KY369101 | 13-33_1389         | ila | PRV/1 | Piscine orthoreovirus isolate 13-33_1389 sigma 3 and p13 protein genes. partial cds                     | USA    | 2012 | <i>Oncorhynchus kisutch</i>     | Purcell     |
| US369102 | 13_33_1595         | ila | PRV/1 | Piscine orthoreovirus isolate 13_33_1595 sigma 3 and p13 protein genes. partial cds                     | USA    | 2012 | <i>Oncorhynchus kisutch</i>     | Purcell     |
| KY369103 | 13_37_1361         | ila | PRV/1 | Piscine orthoreovirus isolate 13_37_1361 sigma 3 and p13 protein genes. partial cds                     | USA    | 2012 | <i>Oncorhynchus mykiss</i>      | Purcell     |
| KY369104 | 13-6_1587          | ila | PRV/1 | Piscine orthoreovirus isolate 13-6_1587 sigma 3 and p13 protein genes. partial cds                      | USA    | 2012 | <i>Oncorhynchus tshawytscha</i> | Purcell     |
| KY369105 | 13-6_1594          | ila | PRV/1 | Piscine orthoreovirus isolate 13-6_1594 sigma 3 and p13 protein genes. partial cds                      | USA    | 2012 | <i>Oncorhynchus tshawytscha</i> | Purcell     |
| KY369106 | 14-11_3            | ila | PRV/1 | Piscine orthoreovirus isolate 14-11_3 sigma 3 and p13 protein genes. partial cds                        | USA    | 2012 | <i>Oncorhynchus tshawytscha</i> | Purcell     |
| US369107 | 14-18_13           | ila | PRV/1 | Piscine orthoreovirus isolate 14-18_13 sigma 3 and p13 protein genes. partial cds                       | USA    | 2012 | <i>Salmo salar</i>              | Purcell     |
| KY369108 | 14-21_16           | ila | PRV/1 | Piscine orthoreovirus isolate 14-21_16 sigma 3 and p13 protein genes. partial cds                       | USA    | 2012 | <i>Oncorhynchus kisutch</i>     | Purcell     |
| KY369109 | 14-22_12           | ila | PRV/1 | Piscine orthoreovirus isolate 14-22_12 sigma 3 and p13 protein genes. partial cds                       | USA    | 2012 | <i>Oncorhynchus kisutch</i>     | Purcell     |
| KY369110 | 14-29_15           | ila | PRV/1 | Piscine orthoreovirus isolate 14-29_15 sigma 3 and p13 protein genes. partial cds                       | USA    | 2012 | <i>Oncorhynchus kisutch</i>     | Purcell     |
| KY369111 | 14-29_2            | ila | PRV/1 | Piscine orthoreovirus isolate 14-29_2 sigma 3 and p13 protein genes. partial cds                        | USA    | 2012 | <i>Oncorhynchus tshawytscha</i> | Purcell     |
| KY369112 | 14-30_5            | ila | PRV/1 | Piscine orthoreovirus isolate 14-30_5 sigma 3 and p13 protein genes. partial cds                        | USA    | 2013 | <i>Oncorhynchus tshawytscha</i> | Purcell     |
| KY369113 | 15-10_8            | ila | PRV/1 | Piscine orthoreovirus isolate 15-10_8 sigma 3 and p13 protein genes. partial cds                        | USA    | 2013 | <i>Oncorhynchus kisutch</i>     | Purcell     |
| KY369114 | 15-3_9             | ila | PRV/1 | Piscine orthoreovirus isolate 15-3_9 sigma 3 and p13 protein genes. partial cds                         | USA    | 2013 | <i>Oncorhynchus tshawytscha</i> | Purcell     |
| KY369115 | 15-8_2             | ila | PRV/1 | Piscine orthoreovirus isolate 15-8_2 sigma 3 and p13 protein genes. partial cds                         | USA    | 2013 | <i>Oncorhynchus kisutch</i>     | Purcell     |
| US369116 | 15-9_5             | ila | PRV/1 | Piscine orthoreovirus isolate 15-9_5 sigma 3 and p13 protein genes. partial cds                         | USA    | 2013 | <i>Oncorhynchus kisutch</i>     | Purcell     |
| KY369117 | 15-28_9            | ila | PRV/1 | Piscine orthoreovirus isolate 15-28_9 sigma 3 and p13 protein genes. partial cds                        | USA    | 2013 | <i>Oncorhynchus gorbuscha</i>   | Purcell     |
| KY369118 | 15-29_5            | ila | PRV/1 | Piscine orthoreovirus isolate 15-29_5 sigma 3 and p13 protein genes. partial cds                        | USA    | 2013 | <i>Oncorhynchus kisutch</i>     | Purcell     |
| KY369119 | 15-29_8            | ila | PRV/1 | Piscine orthoreovirus isolate 15-29_8 sigma 3 and p13 protein genes. partial cds                        | USA    | 2013 | <i>Oncorhynchus kisutch</i>     | Purcell     |
| KY369120 | 15-30_15           | ila | PRV/1 | Piscine orthoreovirus isolate 15-30_15 sigma 3 and p13 protein genes. partial cds                       | USA    | 2013 | <i>Oncorhynchus kisutch</i>     | Purcell     |
| KY369121 | 15-56_17           | ila | PRV/2 | Piscine orthoreovirus isolate 15-56_17 sigma 3 and p13 protein genes. partial cds                       | USA    | 2013 | <i>Oncorhynchus mykiss</i>      | Purcell     |
| KY369122 | 15-57_1            | ila | PRV/1 | Piscine orthoreovirus isolate 15-57_1 sigma 3 and p13 protein genes. partial cds                        | USA    | 2013 | <i>Oncorhynchus kisutch</i>     | Purcell     |
| KY369123 | 15-57_8            | ila | PRV/1 | Piscine orthoreovirus isolate 15-57_8 sigma 3 and p13 protein genes. partial cds                        | USA    | 2013 | <i>Oncorhynchus kisutch</i>     | Purcell     |
| KY369124 | 15-32_3            | ila | PRV/1 | Piscine orthoreovirus isolate 15-32_3 p13 protein and sigma 3 genes. partial cds                        | USA    | 2013 | <i>Oncorhynchus kisutch</i>     | Purcell     |
| KY369125 | 15-21_14           | ila | PRV/1 | Piscine orthoreovirus isolate 15-21_14 sigma 3 and p13 protein genes. partial cds                       | USA    | 2013 | <i>Oncorhynchus tshawytscha</i> | Purcell     |
| KY369126 | 15-26_1            | ila | PRV/1 | Piscine orthoreovirus isolate 15-26_1 sigma 3 and p13 protein genes. partial cds                        | USA    | 2013 | <i>Oncorhynchus kisutch</i>     | Purcell     |
| KY379959 | 15-34_11           | ila | PRV/1 | Piscine orthoreovirus isolate 15-34_11 sigma 3 and p13 protein genes. partial cds                       | USA    | 2013 | <i>Oncorhynchus kisutch</i>     | Purcell     |
| KY429947 | NOR2012-V3621      | ib  | PRV/1 | Piscine orthoreovirus isolate NOR2012-V3621 segment M2, complete sequence                               | Norway | 2012 | <i>Salmo salar</i>              | Wessel      |
| KY429949 | NOR2012-V3621      | ib  | PRV/1 | dump description                                                                                        | Norway | 2012 | <i>Salmo salar</i>              | Wessel      |
| LC145613 | PRV-2              | ilb | PRV/2 | Piscine orthoreovirus 2 genomic RNA, segment M2, complete sequence                                      | Japan  | 2012 | <i>Oncorhynchus kisutch</i>     | Takano      |
| LC145616 | PRV-2              | ilb | PRV/2 | Piscine orthoreovirus 2 genomic RNA, segment S1, complete sequence                                      | Japan  | 2012 | <i>Oncorhynchus kisutch</i>     | Takano      |
| LN680851 | F445-2013/NOR      | ila | PRV/3 | Reovirus sp. rainbow trout/F445-2013/NOR partial segment 1 for sigma 3 protein                          | Norway | 2013 | <i>Oncorhynchus mykiss</i>      | Olson       |
| MF946290 | VT10092015-122     | ila | PRV/1 | Piscine orthoreovirus isolate VT10092015-122 outer clamp protein and p13 genes. complete cds            | Canada | 2015 | <i>Salmo salar</i>              | Kibenge     |
| MF946291 | VT10092015-123     | ila | PRV/1 | Piscine orthoreovirus isolate VT10092015-123 outer clamp protein and p13 genes. complete cds            | Canada | 2015 | <i>Salmo salar</i>              | Kibenge     |
| MF946292 | VT10092015-125     | ila | PRV/1 | Piscine orthoreovirus isolate VT10092015-125 outer clamp protein and p13 genes. complete cds            | Canada | 2015 | <i>Salmo salar</i>              | Kibenge     |
| MF946293 | VT12072015-130     | ila | PRV/1 | Piscine orthoreovirus isolate VT12072015-130 outer clamp protein and p13 genes. complete cds            | Canada | 2015 | <i>Salmo salar</i>              | Kibenge     |
| MF946294 | VT12072015-132     | ila | PRV/1 | Piscine orthoreovirus isolate VT12072015-132 outer clamp protein and p13 genes. complete cds            | Canada | 2015 | <i>Salmo salar</i>              | Kibenge     |
| MF946295 | VT12072015-137     | ila | PRV/1 | Piscine orthoreovirus isolate VT12072015-137 outer clamp protein and p13 genes. complete cds            | Canada | 2015 | <i>Salmo salar</i>              | Kibenge     |
| MF946296 | VT12162015-141     | ila | PRV/1 | Piscine orthoreovirus isolate VT12162015-141 outer clamp protein and p13 genes. complete cds            | Canada | 2015 | <i>Salmo salar</i>              | Kibenge     |
| MF946297 | VT01222016-15      | ila | PRV/1 | Piscine orthoreovirus isolate VT01222016-15 outer clamp protein and p13 genes. complete cds             | Canada | 2015 | <i>Salmo salar</i>              | Kibenge     |
| MF946298 | VT06082016-37      | ila | PRV/1 | Piscine orthoreovirus isolate VT06082016-37 outer clamp protein and p13 genes. complete cds             | Canada | 2016 | <i>Salmo salar</i>              | Kibenge     |
| MF946299 | VT02162017-59      | ila | PRV/1 | Piscine orthoreovirus isolate VT02162017-59 outer clamp protein and p13 genes. complete cds             | Norway | 2017 | <i>Salmo salar</i>              | Kibenge     |
| MF946300 | VT03022017-69      | ila | PRV/1 | Piscine orthoreovirus isolate VT03022017-69 outer clamp protein and p13 genes. complete cds             | Canada | 2017 | <i>Salmo salar</i>              | Kibenge     |
| MF946301 | VT03302017-99      | ila | PRV/1 | Piscine orthoreovirus isolate VT03302017-99 outer clamp protein and p13 genes. complete cds             | Canada | 2017 | <i>Salmo salar</i>              | Kibenge     |
| MF946302 | VT04282017A-108-10 | ila | PRV/1 | Piscine orthoreovirus isolate VT04282017A-108-10 outer clamp protein and p13 genes. complete cds        | Canada | 2017 | <i>Salmo salar</i>              | Kibenge     |
| MG253811 | NOR/060214         | ila | PRV/3 | Piscine orthoreovirus 3 strain NOR/060214 segment M2, nu 1 protein gene, complete cds                   | Norway | 2013 | <i>Oncorhynchus mykiss</i>      | Dhamotharan |
| MG253816 | NOR/060214         | ila | PRV/3 | Piscine orthoreovirus 3 strain NOR/060214 segment S1 sigma 3 and p13 genes. complete cds                | Norway | 2014 | <i>Oncorhynchus mykiss</i>      | Dhamotharan |
| MG720339 | 12-105_(58)        | ila | PRV/1 | Piscine orthoreovirus isolate 12-105_(58) F-Andoy 2012 Escaped segment S1 sigma 3 protein gene          | Norway | 2012 | <i>Salmo salar</i>              | Madhun      |
| MG720340 | 12-112_(59)        | ila | PRV/1 | Piscine orthoreovirus isolate 12-112_(59) F-Andoy 2012 Escaped segment S1 sigma 3 protein gene          | Norway | 2012 | <i>Salmo salar</i>              | Madhun      |
| MG720341 | 12-115_(60)        | ila | PRV/1 | Piscine orthoreovirus isolate 12-115_(60) F-Andoy 2012 Escaped segment S1 sigma 3 protein gene          | Norway | 2012 | <i>Salmo salar</i>              | Madhun      |
| MG720342 | 22-6_(9)           | ila | PRV/1 | Piscine orthoreovirus isolate 22-6_(9) B-Nordkapp 2012 Escaped segment S1 sigma 3 protein gene          | Norway | 2012 | <i>Salmo salar</i>              | Madhun      |
| MG720343 | 12-142_(61)        | ila | PRV/1 | Piscine orthoreovirus isolate 12-142_(61) F-Andoy 2012 Escaped segment S1 sigma 3 protein gene          | Norway | 2012 | <i>Salmo salar</i>              | Madhun      |
| MG720344 | 38-172_(44)        | ila | PRV/1 | Piscine orthoreovirus isolate 38-172_(44) D-Manes 2012 Wild segment S1 sigma 3 protein gene, partial    | Norway | 2012 | <i>Salmo salar</i>              | Madhun      |
| MG720345 | 8-032_(62)         | ila | PRV/1 | Piscine orthoreovirus isolate 8-032_(62) A-Bugynes 2012 Escaped segment S1 sigma 3 protein gene         | Norway | 2012 | <i>Salmo salar</i>              | Madhun      |
| MG720346 | 38-242_(43)        | ila | PRV/1 | Piscine orthoreovirus isolate 38-242_(43) D-Manes 2012 Escaped segment S1 sigma 3 protein gene          | Norway | 2012 | <i>Salmo salar</i>              | Madhun      |
| MG720347 | 38-197_(48)        | ila | PRV/1 | Piscine orthoreovirus isolate 38-197_(48) D-Manes 2012 Escaped segment S1 sigma 3 protein gene          | Norway | 2012 | <i>Salmo salar</i>              | Madhun      |
| MG720348 | 31-60_(54)         | ila | PRV/1 | Piscine orthoreovirus isolate 31-60_(54) C-Alta 2012 Escaped segment S1 sigma 3 protein gene            | Norway | 2012 | <i>Salmo salar</i>              | Madhun      |
| MG720349 | 8-093_(63)         | ila | PRV/1 | Piscine orthoreovirus isolate 8-093_(63) A-Bugynes 2012 Wild segment S1 sigma 3 protein gene, partial   | Norway | 2012 | <i>Salmo salar</i>              | Madhun      |
| MG720350 | 38-267_(36)        | ila | PRV/1 | Piscine orthoreovirus isolate 38-267_(36) D-Manes 2012 Wild segment S1 sigma 3 protein gene, partial    | Norway | 2012 | <i>Salmo salar</i>              | Madhun      |
| MG720351 | 38-382_(18)        | ila | PRV/1 | Piscine orthoreovirus isolate 38-382_(18) D-Manes 2012 Escaped segment S1 sigma 3 protein gene          | Norway | 2012 | <i>Salmo salar</i>              | Madhun      |
| MG720352 | 38-369_(42)        | ila | PRV/1 | Piscine orthoreovirus isolate 38-369_(42) D-Manes 2012 Wild segment S1 sigma 3 protein gene, partial    | Norway | 2012 | <i>Salmo salar</i>              | Madhun      |
| MG720353 | 38-225_(45)        | ila | PRV/1 | Piscine orthoreovirus isolate 38-225_(45) D-Manes 2012 Escaped segment S1 sigma 3 protein gene          | Norway | 2012 | <i>Salmo salar</i>              | Madhun      |
| MG720354 | 38-268_(13)        | ila | PRV/1 | Piscine orthoreovirus isolate 38-268_(13) D-Manes 2012 Wild segment S1 sigma 3 protein gene, partial    | Norway | 2012 | <i>Salmo salar</i>              | Madhun      |
| MG720355 | 12-503_(15)        | ila | PRV/1 | Piscine orthoreovirus isolate 12-503_(15) E-Stannes 2012 Escaped segment S1 sigma 3 protein gene        | Norway | 2012 | <i>Salmo salar</i>              | Madhun      |
| MG720356 | 12-208_(55)        | ila | PRV/1 | Piscine orthoreovirus isolate 12-208_(55) F-Andoy 2012 Escaped segment S1 sigma 3 protein gene          | Norway | 2012 | <i>Salmo salar</i>              | Madhun      |
| MG720357 | 12-501_(16)        | ila | PRV/1 | Piscine orthoreovirus isolate 12-501_(16) F-Andoy 2012 Escaped segment S1 sigma 3 protein gene          | Norway | 2012 | <i>Salmo salar</i>              | Madhun      |
| MG720358 | 38-181_(41)        | ila | PRV/1 | Piscine orthoreovirus isolate 38-181_(41) D-Manes 2012 Escaped segment S1 sigma 3 protein gene          | Norway | 2012 | <i>Salmo salar</i>              | Madhun      |
| MG720359 | 38-225_(40)        | ila | PRV/1 | Piscine orthoreovirus isolate 38-225_(40) D-Manes 2012 Escaped segment S1 sigma 3 protein gene          | Norway | 2012 | <i>Salmo salar</i>              | Madhun      |
| MG720360 | 12-31_(14)         | ila | PRV/1 | Piscine orthoreovirus isolate 12-31_(14) E-Stannes 2012 Wild segment S1 sigma 3 protein gene, partial   | Norway | 2012 | <i>Salmo salar</i>              | Madhun      |
| MG720361 | 38-368_(37)        | ila | PRV/1 | Piscine orthoreovirus isolate 38-368_(37) D-Manes 2012 Wild segment S1 sigma 3 protein gene, partial    | Norway | 2012 | <i>Salmo salar</i>              | Madhun      |
| MG720362 | 38-182_(39)        | ila | PRV/1 | Piscine orthoreovirus isolate 38-182_(39) D-Manes 2012 Escaped segment S1 sigma 3 protein gene          | Norway | 2012 | <i>Salmo salar</i>              | Madhun      |
| MG720363 | 38-183_(12)        | ila | PRV/1 | Piscine orthoreovirus isolate 38-183_(12) D-Manes 2012 Escaped segment S1 sigma 3 protein gene          | Norway | 2012 | <i>Salmo salar</i>              | Madhun      |
| MG720364 | 38-196_(34)        | ila | PRV/1 | Piscine orthoreovirus isolate 38-196_(34) D-Manes 2012 Escaped segment S1 sigma 3 protein gene          | Norway | 2012 | <i>Salmo salar</i>              | Madhun      |
| MG720365 | 31-02_(53)         | ila | PRV/1 | Piscine orthoreovirus isolate 31-02_(53) C-Alta 2012 Escaped segment S1 sigma 3 protein gene, partial   | Norway | 2012 | <i>Salmo salar</i>              | Madhun      |
| MG720366 | 12-35_(57)         | ila | PRV/1 | Piscine orthoreovirus isolate 12-35_(57) E-Stannes 2012 Wild segment S1 sigma 3 protein gene, partial   | Norway | 2012 | <i>Salmo salar</i>              | Madhun      |
| MG720367 | 8-017_(17)         | ila | PRV/1 | Piscine orthoreovirus isolate 8-017_(17) A-Bugynes 2012 Wild segment S1 sigma 3 protein gene, partial   | Norway | 2012 | <i>Salmo salar</i>              | Madhun      |
| MG720368 | 31-72_(7)          | ila | PRV/1 | Piscine orthoreovirus isolate 31-72_(7) C-Alta 2012 Wild segment S1 sigma 3 protein gene, partial cds   | Norway | 2012 | <i>Salmo salar</i>              | Madhun      |
| MG720369 | 38-207_(35)        | ila | PRV/1 | Piscine orthoreovirus isolate 38-207_(35) D-Manes 2012 Escaped segment S1 sigma 3 protein gene          | Norway | 2012 | <i>Salmo salar</i>              | Madhun      |
| MG720370 | 22-14_(8)          | ila | PRV/1 | Piscine orthoreovirus isolate 22-14_(8) B-Nordkapp 2012 Wild segment S1 sigma 3 protein gene, partial   | Norway | 2012 | <i>Salmo salar</i>              | Madhun      |
| MG720371 | 38-365_(40)        | ila | PRV/1 | Piscine orthoreovirus isolate 38-365_(40) D-Manes 2012 Escaped segment S1 sigma 3 protein gene          | Norway | 2012 | <i>Salmo salar</i>              | Madhun      |
| MG720372 | 38-367_(11)        | ila | PRV/1 | Piscine orthoreovirus isolate 38-367_(11) D-Manes 2012 Escaped segment S1 sigma 3 protein gene          | Norway | 2012 | <i>Salmo salar</i>              | Madhun      |
| MG720373 | 38-185_(33)        | ila | PRV/1 | Piscine orthoreovirus isolate 38-185_(33) D-Manes 2012 Escaped segment S1 sigma 3 protein gene          |        |      |                                 |             |

PRV\_metadata

|          |                   |         |         |                                                                                                                  |               |      |                             |             |
|----------|-------------------|---------|---------|------------------------------------------------------------------------------------------------------------------|---------------|------|-----------------------------|-------------|
| MH581207 | VT03262018-84     | la      | PRV1    | Piscine orthoreovirus isolate VT03262018-84 outer clamp protein and non-structural protein genes                 | Canada        | 2018 | <i>Salmo salar</i>          | Kibenge     |
| MH581208 | VT03262018-88     | la      | PRV1    | Piscine orthoreovirus isolate VT03262018-88 outer clamp protein and non-structural protein genes                 | Canada        | 2018 | <i>Salmo salar</i>          | Kibenge     |
| MH581209 | VT04062018-105    | la      | PRV1    | Piscine orthoreovirus isolate VT04062018-105 outer clamp protein and non-structural protein genes                | Canada        | 2018 | <i>Salmo salar</i>          | Kibenge     |
| MH581210 | VT04062018-106    | la      | PRV1    | Piscine orthoreovirus isolate VT04062018-106 outer clamp protein and non-structural protein genes                | Canada        | 2018 | <i>Salmo salar</i>          | Kibenge     |
| MH581211 | VT04062018-108    | la      | PRV1    | Piscine orthoreovirus isolate VT04062018-108 outer clamp protein and non-structural protein genes                | Canada        | 2018 | <i>Salmo salar</i>          | Kibenge     |
| MH581212 | VT04062018-109    | la      | PRV1    | Piscine orthoreovirus isolate VT04062018-109 outer clamp protein and non-structural protein genes                | Canada        | 2018 | <i>Salmo salar</i>          | Kibenge     |
| MK052922 | 13(P2)            | lla     | PRV3    | Piscine orthoreovirus isolate 13(P2) segment S1, complete sequence                                               | Chile         | 2018 | <i>Oncorhynchus kisutch</i> | Cartagena   |
| MK052923 | 14(P2)            | lla     | PRV3    | Piscine orthoreovirus isolate 14(P2) segment S1, complete sequence                                               | Chile         | 2018 | <i>Oncorhynchus kisutch</i> | Cartagena   |
| MK052924 | 15(P2)            | lla     | PRV3    | Piscine orthoreovirus isolate 15(P2) segment S1, complete sequence                                               | Chile         | 2018 | <i>Oncorhynchus kisutch</i> | Cartagena   |
| MK052925 | 17(P5)            | lb      | PRV1    | Piscine orthoreovirus isolate 17(P5) segment S1, complete sequence                                               | Chile         | 2018 | <i>Oncorhynchus kisutch</i> | Cartagena   |
| MK052926 | 18(P5)            | lb      | PRV1    | Piscine orthoreovirus isolate 18(P5) segment S1, complete sequence                                               | Chile         | 2018 | <i>Oncorhynchus kisutch</i> | Cartagena   |
| MK052927 | 19(P2)            | lla     | PRV3    | Piscine orthoreovirus isolate 19(P2) segment S1, complete sequence                                               | Chile         | 2018 | <i>Oncorhynchus kisutch</i> | Cartagena   |
| MK052928 | 23(P2)            | lla     | PRV3    | Piscine orthoreovirus isolate 23(P2) segment S1, complete sequence                                               | Chile         | 2018 | <i>Oncorhynchus kisutch</i> | Cartagena   |
| MK052929 | 25(P5)            | lb      | PRV1    | Piscine orthoreovirus isolate 25(P5) segment S1, complete sequence                                               | Chile         | 2018 | <i>Oncorhynchus kisutch</i> | Cartagena   |
| MK052930 | 27(P5)            | lb      | PRV1    | Piscine orthoreovirus isolate 27(P5) segment S1, complete sequence                                               | Chile         | 2018 | <i>Oncorhynchus kisutch</i> | Cartagena   |
| MK052931 | 28(P5)            | lb      | PRV1    | Piscine orthoreovirus isolate 28(P5) segment S1, complete sequence                                               | Chile         | 2018 | <i>Oncorhynchus kisutch</i> | Cartagena   |
| MK286552 | Kuehn-PRV2        | lla     | PRV3    | Piscine orthoreovirus outer shell protein gene, partial cds                                                      | Germany       | 2008 | <i>Salmo trutta fario</i>   | Kuehn       |
| MK286554 | Kuehn-PRV2        | lla     | PRV3    | Piscine orthoreovirus outer clamp protein gene, partial cds                                                      | Germany       | 2008 | <i>Salmo trutta fario</i>   | Kuehn       |
| MK368744 | DK-14-15958-4     | la      | PRV1    | Piscine orthoreovirus isolate DK-14-15958-4 sigma 3 protein gene, complete cds                                   | Denmark       | 2014 | <i>Salmo salar</i>          | Vendramin   |
| MK368745 | DK-2013-50-288-63 | la      | PRV1    | Piscine orthoreovirus isolate DK-2013-50-288-63 sigma 3 protein gene, partial cds                                | Denmark       | 2013 | <i>Salmo salar</i>          | Vendramin   |
| MK368746 | DK-2013-50-259-10 | la      | PRV1    | Piscine orthoreovirus isolate DK-2013-50-259-10 sigma 3 protein gene, partial cds                                | Denmark       | 2013 | <i>Salmo salar</i>          | Vendramin   |
| MK368747 | DK-2013-50-282-20 | la      | PRV1    | Piscine orthoreovirus isolate DK-2013-50-282-20 sigma 3 protein gene, partial cds                                | Denmark       | 2013 | <i>Salmo salar</i>          | Vendramin   |
| MK368748 | DK-2013-50-282-11 | la      | PRV1    | Piscine orthoreovirus isolate DK-2013-50-282-11 sigma 3 protein gene, partial cds                                | Denmark       | 2013 | <i>Salmo salar</i>          | Vendramin   |
| MK368749 | DK-14-16407-1     | la      | PRV1    | Piscine orthoreovirus isolate DK-14-16407-1 sigma 3 protein gene, partial cds                                    | Denmark       | 2014 | <i>Salmo salar</i>          | Vendramin   |
| MK368750 | DK-2013-50-288-65 | la      | PRV1    | Piscine orthoreovirus isolate DK-2013-50-288-65 sigma 3 protein gene, partial cds                                | Denmark       | 2013 | <i>Salmo salar</i>          | Vendramin   |
| MK368751 | DK-15-23576-37    | lb      | PRV1    | Piscine orthoreovirus isolate DK-15-23576-37 sigma 3 protein gene, partial cds                                   | Denmark       | 2015 | <i>Salmo salar</i>          | Vendramin   |
| MK368752 | DK-14-15550-2     | lb      | PRV1    | Piscine orthoreovirus isolate DK-14-15550-2 sigma 3 protein gene, partial cds                                    | Denmark       | 2015 | <i>Salmo salar</i>          | Vendramin   |
| MK368753 | DK-14-16407-3     | lb      | PRV1    | Piscine orthoreovirus isolate DK-14-16407-3 sigma 3 protein gene, complete cds                                   | Denmark       | 2014 | <i>Salmo salar</i>          | Vendramin   |
| MK368754 | DK-15-23478-20    | lb      | PRV1    | Piscine orthoreovirus isolate DK-15-23478-20 sigma 3 protein gene, partial cds                                   | Denmark       | 2015 | <i>Salmo salar</i>          | Vendramin   |
| MK368755 | SW-17-1611-24     | lb      | PRV1    | Piscine orthoreovirus isolate SW-17-1611-24 sigma 3 protein gene, partial cds                                    | Sweden        | 2017 | <i>Salmo salar</i>          | Vendramin   |
| MK368756 | IR-17-13316-6     | lb      | PRV1    | Piscine orthoreovirus isolate IR-17-13316-6 sigma 3 protein gene, partial cds                                    | Ireland       | 2017 | <i>Salmo salar</i>          | Vendramin   |
| MK368757 | IR-17-6222-57     | la      | PRV1    | Piscine orthoreovirus isolate IR-17-6222-57 sigma 3 protein gene, partial cds                                    | Ireland       | 2017 | <i>Salmo salar</i>          | Vendramin   |
| MK368758 | F211-893-59       | la      | PRV1    | Piscine orthoreovirus isolate F211-893-59 sigma 3 protein gene, partial cds                                      | Faroe Islands | 2011 | <i>Salmo salar</i>          | Vendramin   |
| MK368759 | F211-516-8        | la      | PRV1    | Piscine orthoreovirus isolate F211-516-8 sigma 3 protein gene, partial cds                                       | Faroe Islands | 2011 | <i>Salmo salar</i>          | Vendramin   |
| MK675826 | NOR-1997          | lb      | PRV1    | Piscine orthoreovirus isolate NOR-1997 segment M2 mu1 gene, partial cds                                          | Norway        | 1997 | <i>Salmo salar</i>          | Dhamotharan |
| MK675828 | NOR-1997          | lb      | PRV1    | Piscine orthoreovirus isolate NOR-1997 segment S1 sigma 3 and p13 genes, complete cds                            | Norway        | 1997 | <i>Salmo salar</i>          | Dhamotharan |
| MK675836 | NOR-2005/TT       | lb      | PRV1    | Piscine orthoreovirus isolate NOR-2005/TT segment M2 mu1 gene, complete cds                                      | Norway        | 2005 | <i>Salmo salar</i>          | Dhamotharan |
| MK675838 | NOR-2005/TT       | lb      | PRV1    | Piscine orthoreovirus isolate NOR-2005/TT segment S1 sigma 3 and p13 genes, complete cds                         | Norway        | 2005 | <i>Salmo salar</i>          | Dhamotharan |
| MK675846 | NOR-2015/MS       | lb      | PRV1    | Piscine orthoreovirus isolate NOR-2015/MS segment M2 mu1 gene, complete cds                                      | Norway        | 2015 | <i>Salmo salar</i>          | Dhamotharan |
| MK675848 | NOR-2015/MS       | lb      | PRV1    | Piscine orthoreovirus isolate NOR-2015/MS segment S1 sigma 3 and p13 genes, complete cds                         | Norway        | 2015 | <i>Salmo salar</i>          | Dhamotharan |
| MK675856 | NOR-2015/SSK      | lb      | PRV1    | Piscine orthoreovirus isolate NOR-2015/SSK segment M2 mu1 gene, complete cds                                     | Norway        | 2015 | <i>Salmo salar</i>          | Dhamotharan |
| MK675858 | NOR-2015/SSK      | lb      | PRV1    | Piscine orthoreovirus isolate NOR-2015/SSK segment S1 sigma 3 and p13 genes, complete cds                        | Norway        | 2015 | <i>Salmo salar</i>          | Dhamotharan |
| MK675866 | NOR-1988          | la      | PRV1    | Piscine orthoreovirus isolate NOR-1988 segment M2 mu1 gene, complete cds                                         | Norway        | 1998 | <i>Salmo salar</i>          | Dhamotharan |
| MK675868 | NOR-1988          | la      | PRV1    | Piscine orthoreovirus isolate NOR-1988 segment S1 sigma 3 and p13 genes, complete cds                            | Norway        | 1998 | <i>Salmo salar</i>          | Dhamotharan |
| MK675876 | FO/1978/15        | la      | PRV1    | Piscine orthoreovirus isolate FO/1978/15 segment M2 mu1 gene, complete cds                                       | Denmark       | 2015 | <i>Salmo salar</i>          | Vendramin   |
| MK675878 | FO/1978/15        | la      | PRV1    | Piscine orthoreovirus isolate FO/1978/15 segment S1 sigma 3 and p13 genes, complete cds                          | Denmark       | 2015 | <i>Salmo salar</i>          | Vendramin   |
| MK675886 | FO/41/16          | la      | PRV1    | Piscine orthoreovirus isolate FO/41/16 segment M2 mu1 gene, complete cds                                         | Denmark       | 2016 | <i>Salmo salar</i>          | Vendramin   |
| MK675888 | FO/41/16          | la      | PRV1    | Piscine orthoreovirus isolate FO/41/16 segment S1 sigma 3 and p13 genes, complete cds                            | Denmark       | 2016 | <i>Salmo salar</i>          | Vendramin   |
| MN106287 | J3542             | unknown | unknown | Piscine orthoreovirus isolate J3542 L1 gene, complete cds                                                        | Greenland     | 2017 | <i>Salmo salar</i>          | Teffer      |
| MN106288 | J3575             | unknown | unknown | Piscine orthoreovirus isolate J3575 L1 gene, complete cds                                                        | Greenland     | 2017 | <i>Salmo salar</i>          | Teffer      |
| MN106289 | J3611             | unknown | unknown | Piscine orthoreovirus isolate J3611 L1 gene, complete cds                                                        | Greenland     | 2016 | <i>Salmo salar</i>          | Teffer      |
| MN106290 | J3542             | unknown | unknown | Piscine orthoreovirus isolate J3542 L2 gene, complete cds                                                        | Greenland     | 2017 | <i>Salmo salar</i>          | Teffer      |
| MN106291 | J3575             | unknown | unknown | Piscine orthoreovirus isolate J3575 L2 gene, complete cds                                                        | Greenland     | 2017 | <i>Salmo salar</i>          | Teffer      |
| MN106292 | J3611             | unknown | unknown | Piscine orthoreovirus isolate J3611 L2 gene, complete cds                                                        | Greenland     | 2016 | <i>Salmo salar</i>          | Teffer      |
| MN106293 | J3542             | unknown | unknown | Piscine orthoreovirus isolate J3542 L3 gene, complete cds                                                        | Greenland     | 2017 | <i>Salmo salar</i>          | Teffer      |
| MN106294 | J3575             | unknown | unknown | Piscine orthoreovirus isolate J3575 L3 gene, complete cds                                                        | Greenland     | 2017 | <i>Salmo salar</i>          | Teffer      |
| MN106295 | J3611             | unknown | unknown | Piscine orthoreovirus isolate J3611 L3 gene, complete cds                                                        | Greenland     | 2016 | <i>Salmo salar</i>          | Teffer      |
| MN106296 | J3542             | unknown | unknown | Piscine orthoreovirus isolate J3542 M1 gene, complete cds                                                        | Greenland     | 2017 | <i>Salmo salar</i>          | Teffer      |
| MN106297 | J3575             | unknown | unknown | Piscine orthoreovirus isolate J3575 M1 gene, complete cds                                                        | Greenland     | 2017 | <i>Salmo salar</i>          | Teffer      |
| MN106298 | J3611             | unknown | unknown | Piscine orthoreovirus isolate J3611 M1 gene, complete cds                                                        | Greenland     | 2016 | <i>Salmo salar</i>          | Teffer      |
| MN106299 | J3542             | unknown | unknown | Piscine orthoreovirus isolate J3542 M2 gene, complete cds                                                        | Greenland     | 2017 | <i>Salmo salar</i>          | Teffer      |
| MN106300 | J3575             | unknown | unknown | Piscine orthoreovirus isolate J3575 M2 gene, complete cds                                                        | Greenland     | 2017 | <i>Salmo salar</i>          | Teffer      |
| MN106301 | J3611             | unknown | unknown | Piscine orthoreovirus isolate J3611 M2 gene, complete cds                                                        | Greenland     | 2016 | <i>Salmo salar</i>          | Teffer      |
| MN106302 | J3542             | unknown | unknown | Piscine orthoreovirus isolate J3542 M3 gene, complete cds                                                        | Greenland     | 2017 | <i>Salmo salar</i>          | Teffer      |
| MN106303 | J3575             | unknown | unknown | Piscine orthoreovirus isolate J3575 M3 gene, complete cds                                                        | Greenland     | 2017 | <i>Salmo salar</i>          | Teffer      |
| MN106304 | J3611             | unknown | unknown | Piscine orthoreovirus isolate J3611 M3 gene, complete cds                                                        | Greenland     | 2016 | <i>Salmo salar</i>          | Teffer      |
| MN106305 | J3542             | unknown | unknown | Piscine orthoreovirus isolate J3542 S1 gene, complete cds                                                        | Greenland     | 2017 | <i>Salmo salar</i>          | Teffer      |
| MN106306 | J3575             | unknown | unknown | Piscine orthoreovirus isolate J3575 S1 gene, complete cds                                                        | Greenland     | 2017 | <i>Salmo salar</i>          | Teffer      |
| MN106307 | J3611             | unknown | unknown | Piscine orthoreovirus isolate J3611 S1 gene, complete cds                                                        | Greenland     | 2016 | <i>Salmo salar</i>          | Teffer      |
| MN106308 | J3542             | unknown | unknown | Piscine orthoreovirus isolate J3542 S2 gene, complete cds                                                        | Greenland     | 2017 | <i>Salmo salar</i>          | Teffer      |
| MN106309 | J3575             | unknown | unknown | Piscine orthoreovirus isolate J3575 S2 gene, complete cds                                                        | Greenland     | 2017 | <i>Salmo salar</i>          | Teffer      |
| MN106310 | J3611             | unknown | unknown | Piscine orthoreovirus isolate J3611 S2 gene, complete cds                                                        | Greenland     | 2016 | <i>Salmo salar</i>          | Teffer      |
| MN106311 | J3542             | unknown | unknown | Piscine orthoreovirus isolate J3542 S3 gene, complete cds                                                        | Greenland     | 2017 | <i>Salmo salar</i>          | Teffer      |
| MN106312 | J3575             | unknown | unknown | Piscine orthoreovirus isolate J3575 S3 gene, complete cds                                                        | Greenland     | 2017 | <i>Salmo salar</i>          | Teffer      |
| MN106313 | J3611             | unknown | unknown | Piscine orthoreovirus isolate J3611 S3 gene, complete cds                                                        | Greenland     | 2016 | <i>Salmo salar</i>          | Teffer      |
| MN106314 | J3542             | unknown | unknown | Piscine orthoreovirus isolate J3542 S4 gene, partial cds                                                         | Greenland     | 2016 | <i>Salmo salar</i>          | Teffer      |
| MN106315 | J3575             | unknown | unknown | Piscine orthoreovirus isolate J3575 S4 gene, partial cds                                                         | Greenland     | 2017 | <i>Salmo salar</i>          | Teffer      |
| MN106316 | J3611             | unknown | unknown | Piscine orthoreovirus isolate J3611 S4 gene, partial cds                                                         | Greenland     | 2016 | <i>Salmo salar</i>          | Teffer      |
| MN337614 | 2019-50-212       | unknown | unknown | Piscine orthoreovirus 3 isolate 2019-50-212 S3 gene, partial cds                                                 | Norway        | 2017 | <i>Oncorhynchus mykiss</i>  | Modal       |
| NC036472 | CGA280-05         | lb      | PRV1    | Piscine reovirus isolate CGA280-05 outer clamp protein and non-structural protein gene, segment S1, complete cds | Chile         | 2011 | <i>Salmo salar</i>          | Kibenge     |
