# Supplementary figures and images for: Extensive Phylogenetic Analysis of Piscine Orthoreovirus Genomic Sequences Shows the Robustness of Subgenotype Classification
Source: MDPI journal article supplement (doi:10.3390/pathogens10010041), 2021-01-07

### Sigma 3 Matrix Di

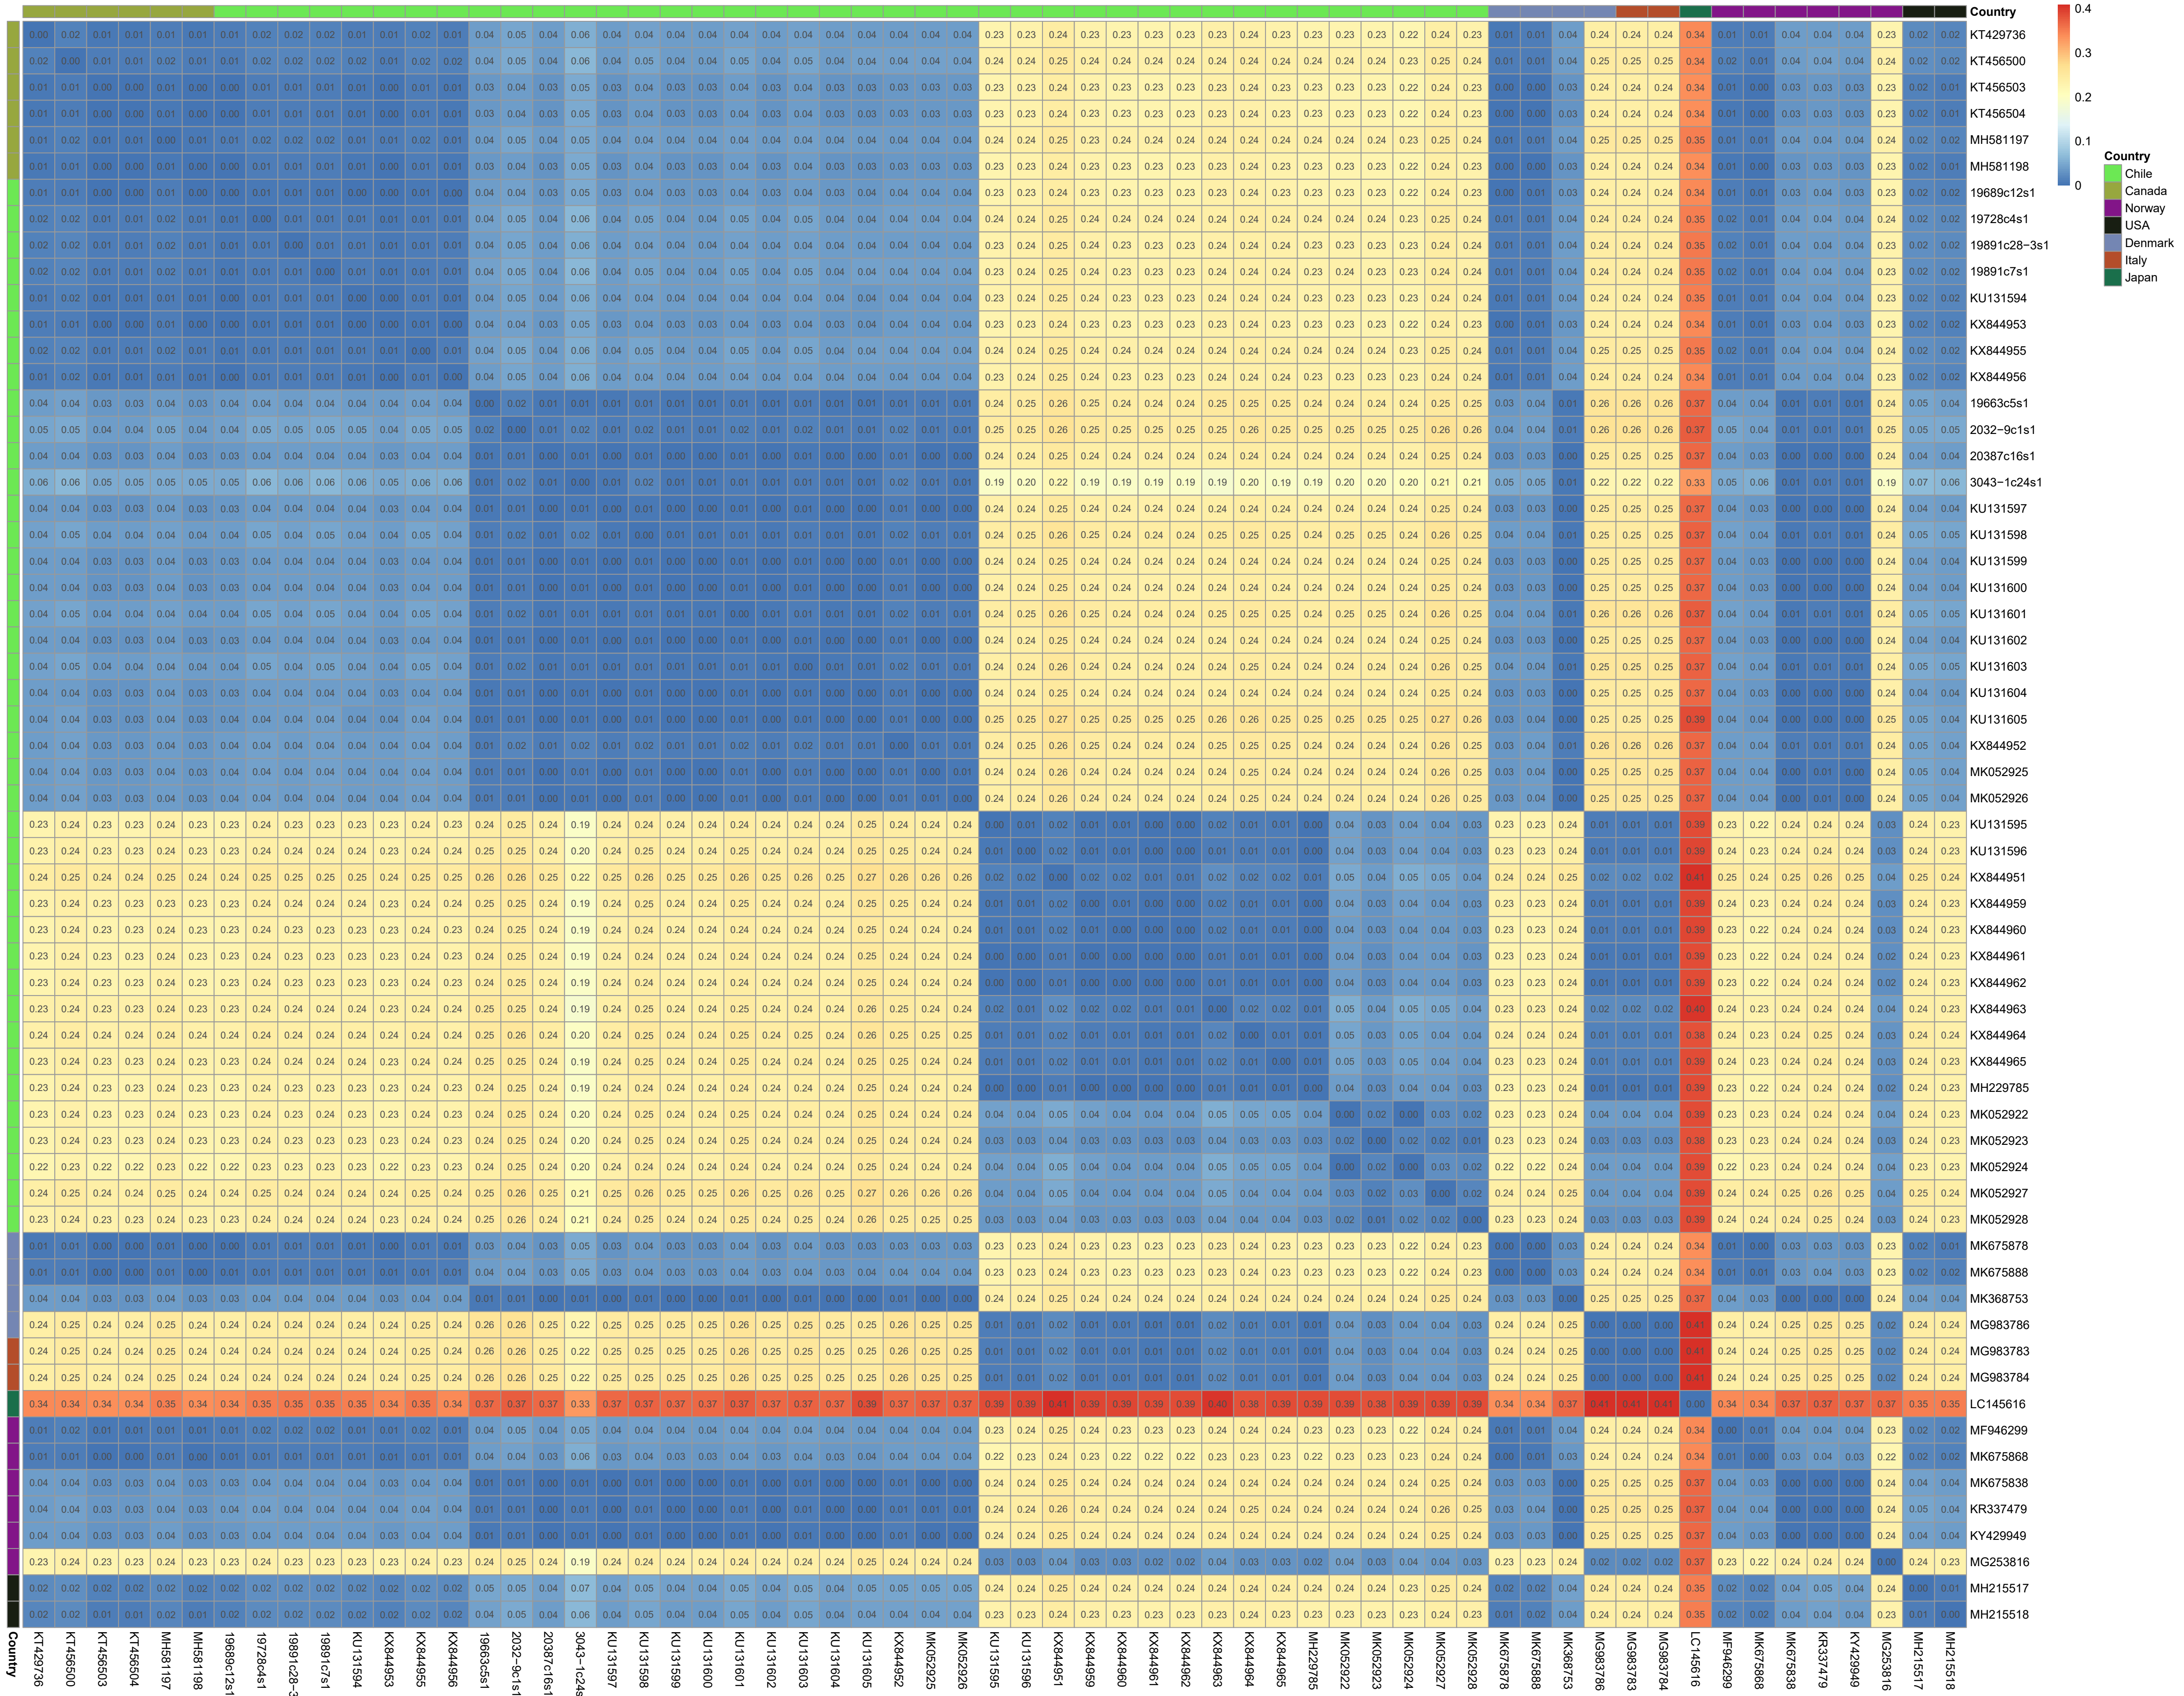

Supplement: s1 [file s1]

## Mu 1 Matrix Distance

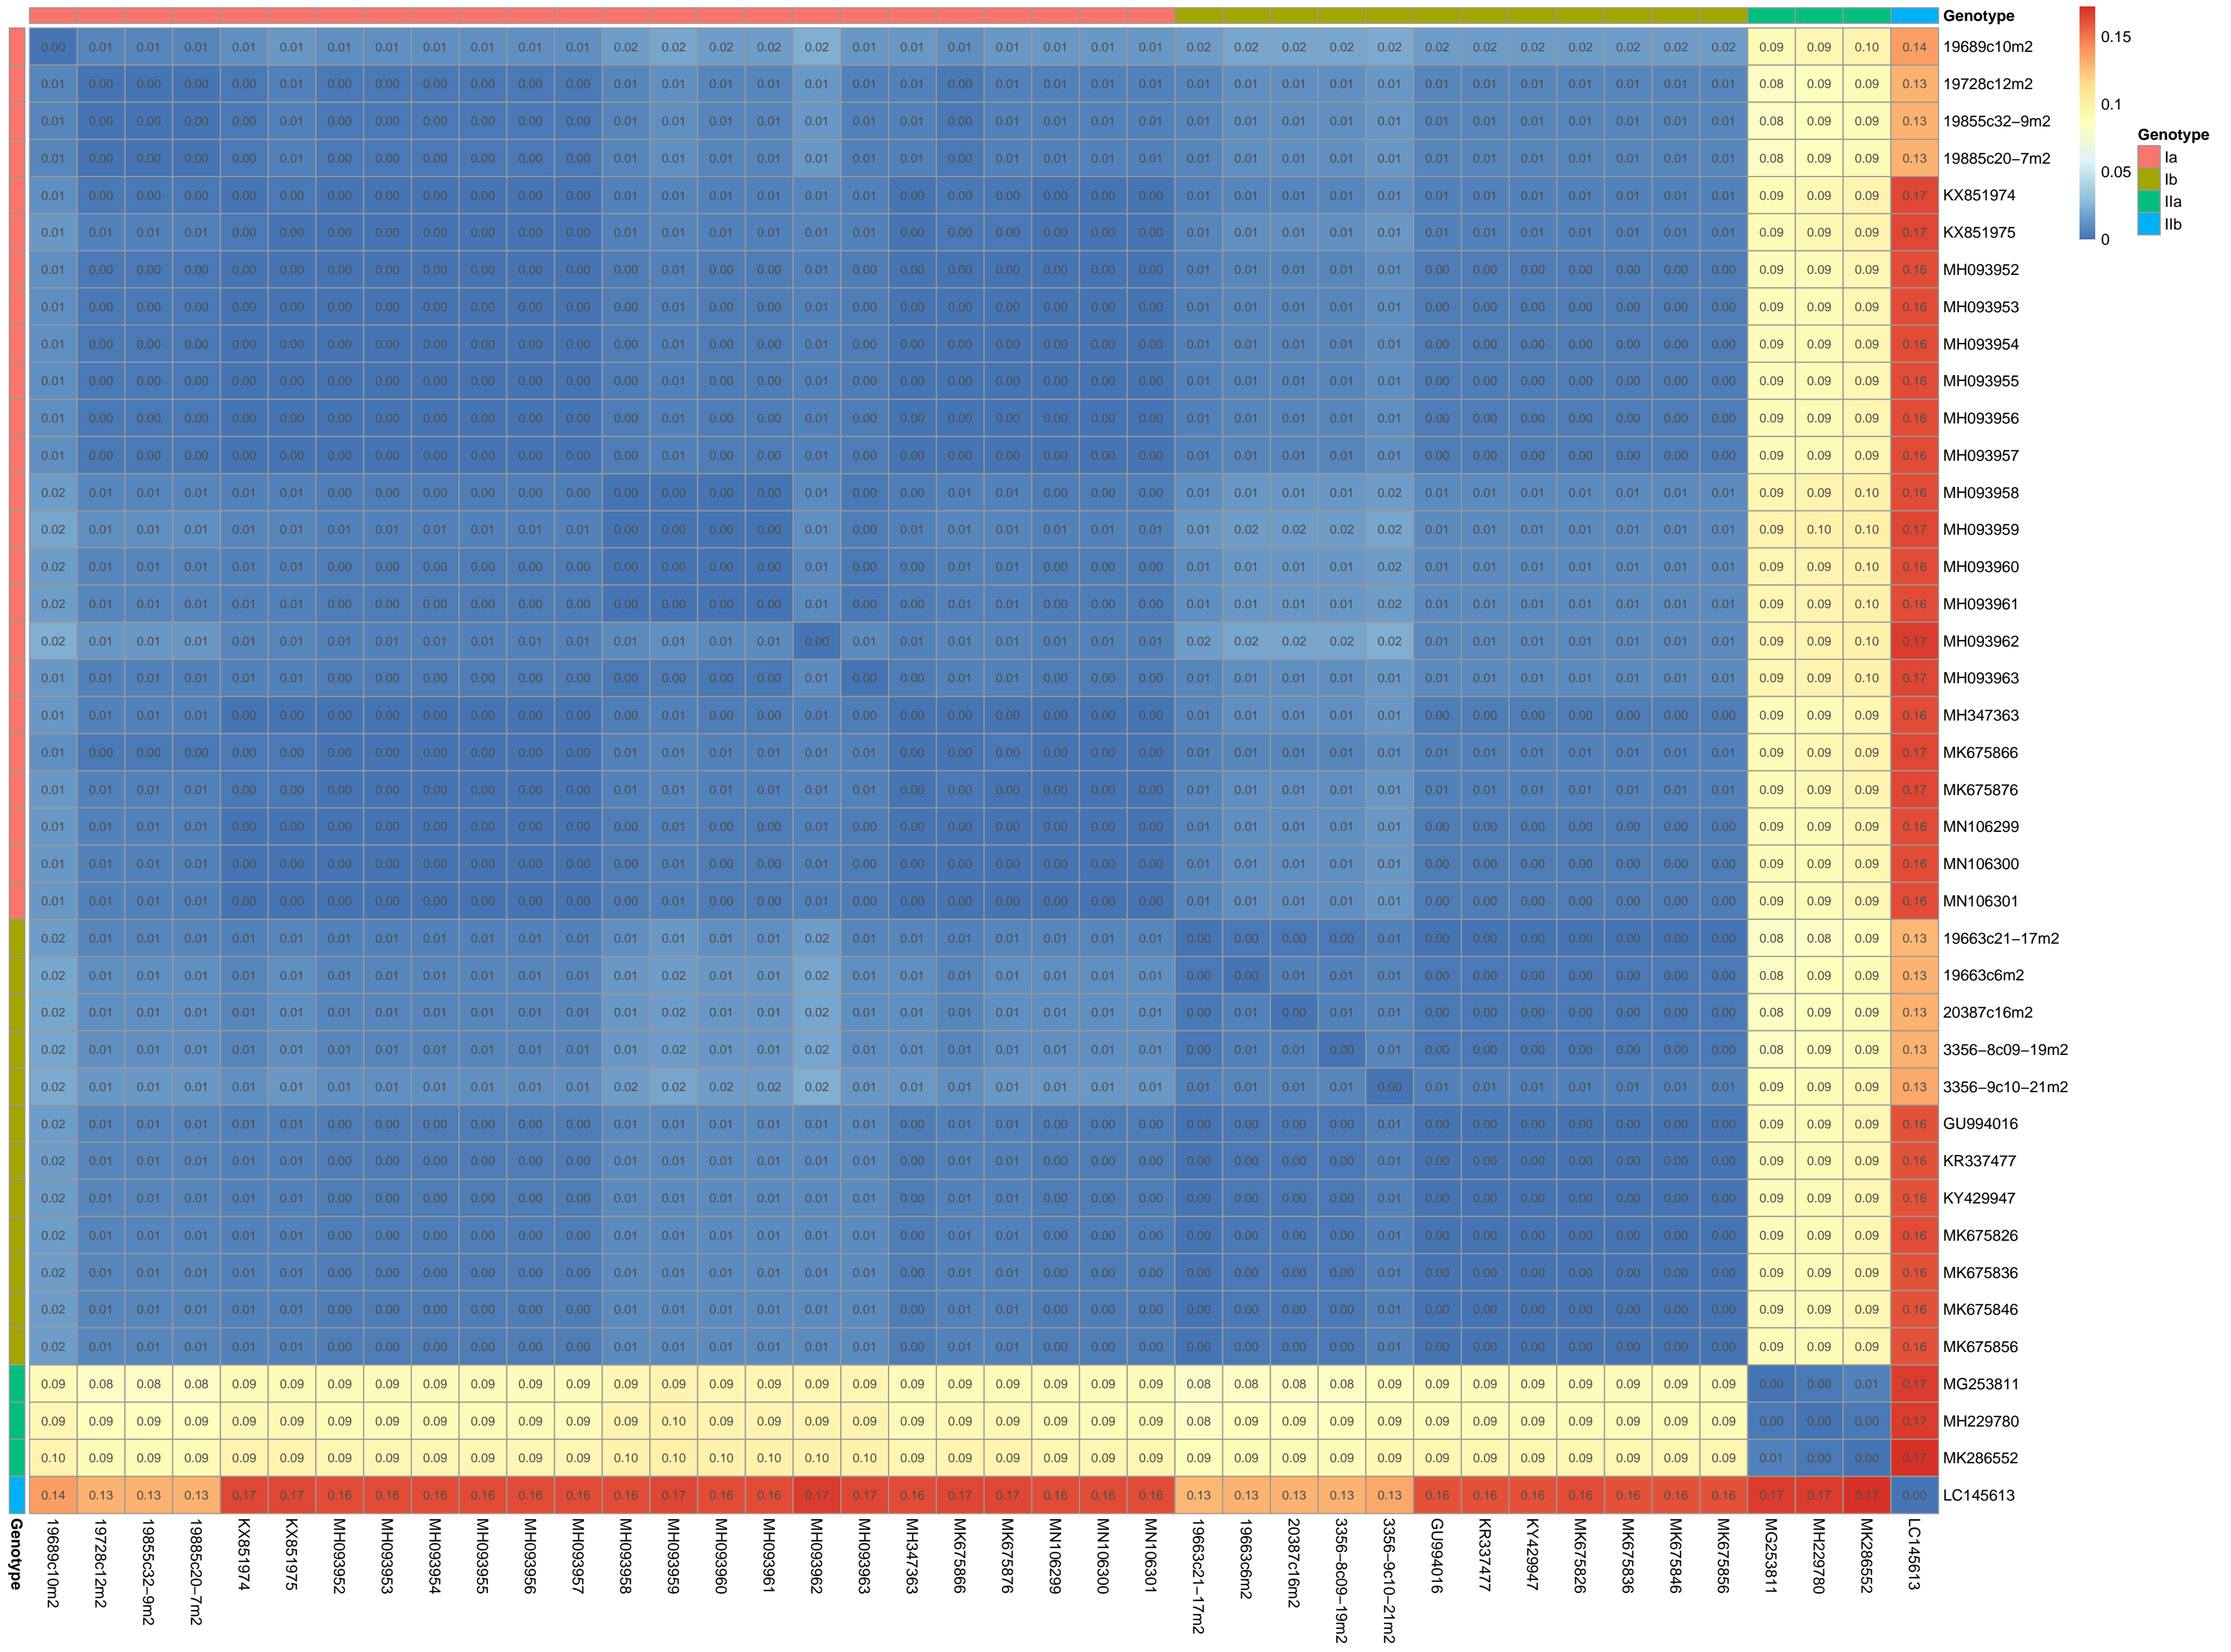

Supplement: s1 [file s1]

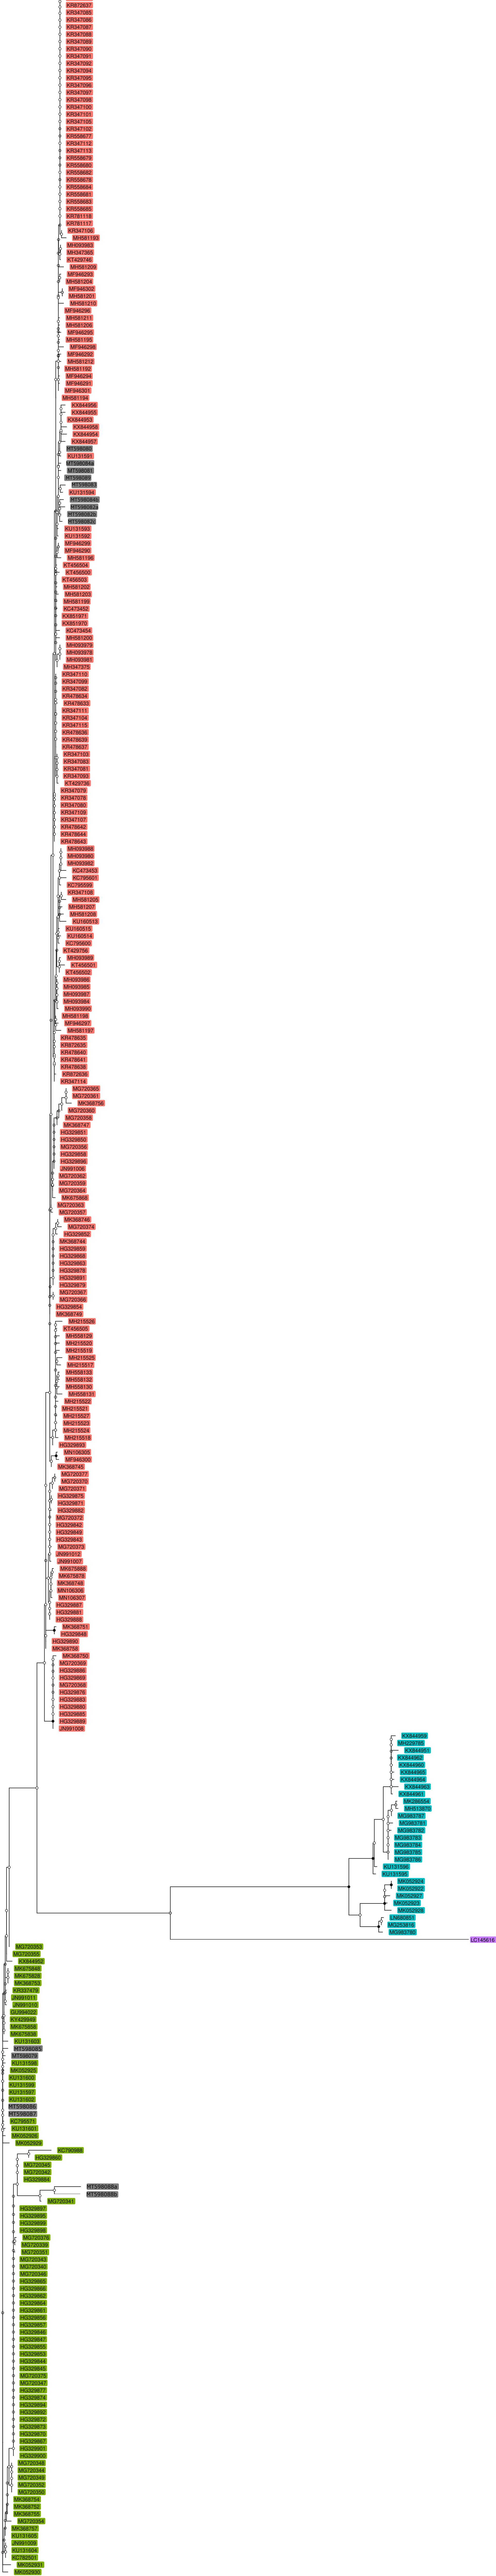

factor(genotype)

|   |               |
|---|---------------|
| a | la            |
| a | lb            |
| a | lla           |
| a | llb           |
| a | New sequences |

Bootstrap support (BP)

|   |                |
|---|----------------|
| ● | BP ≥ 0.9       |
| ○ | 0.7 ≤ BP < 0.9 |
| ○ | BP < 0.7       |

Supplement: s1 [file s1]

### Sigma 3 Matrix Distance

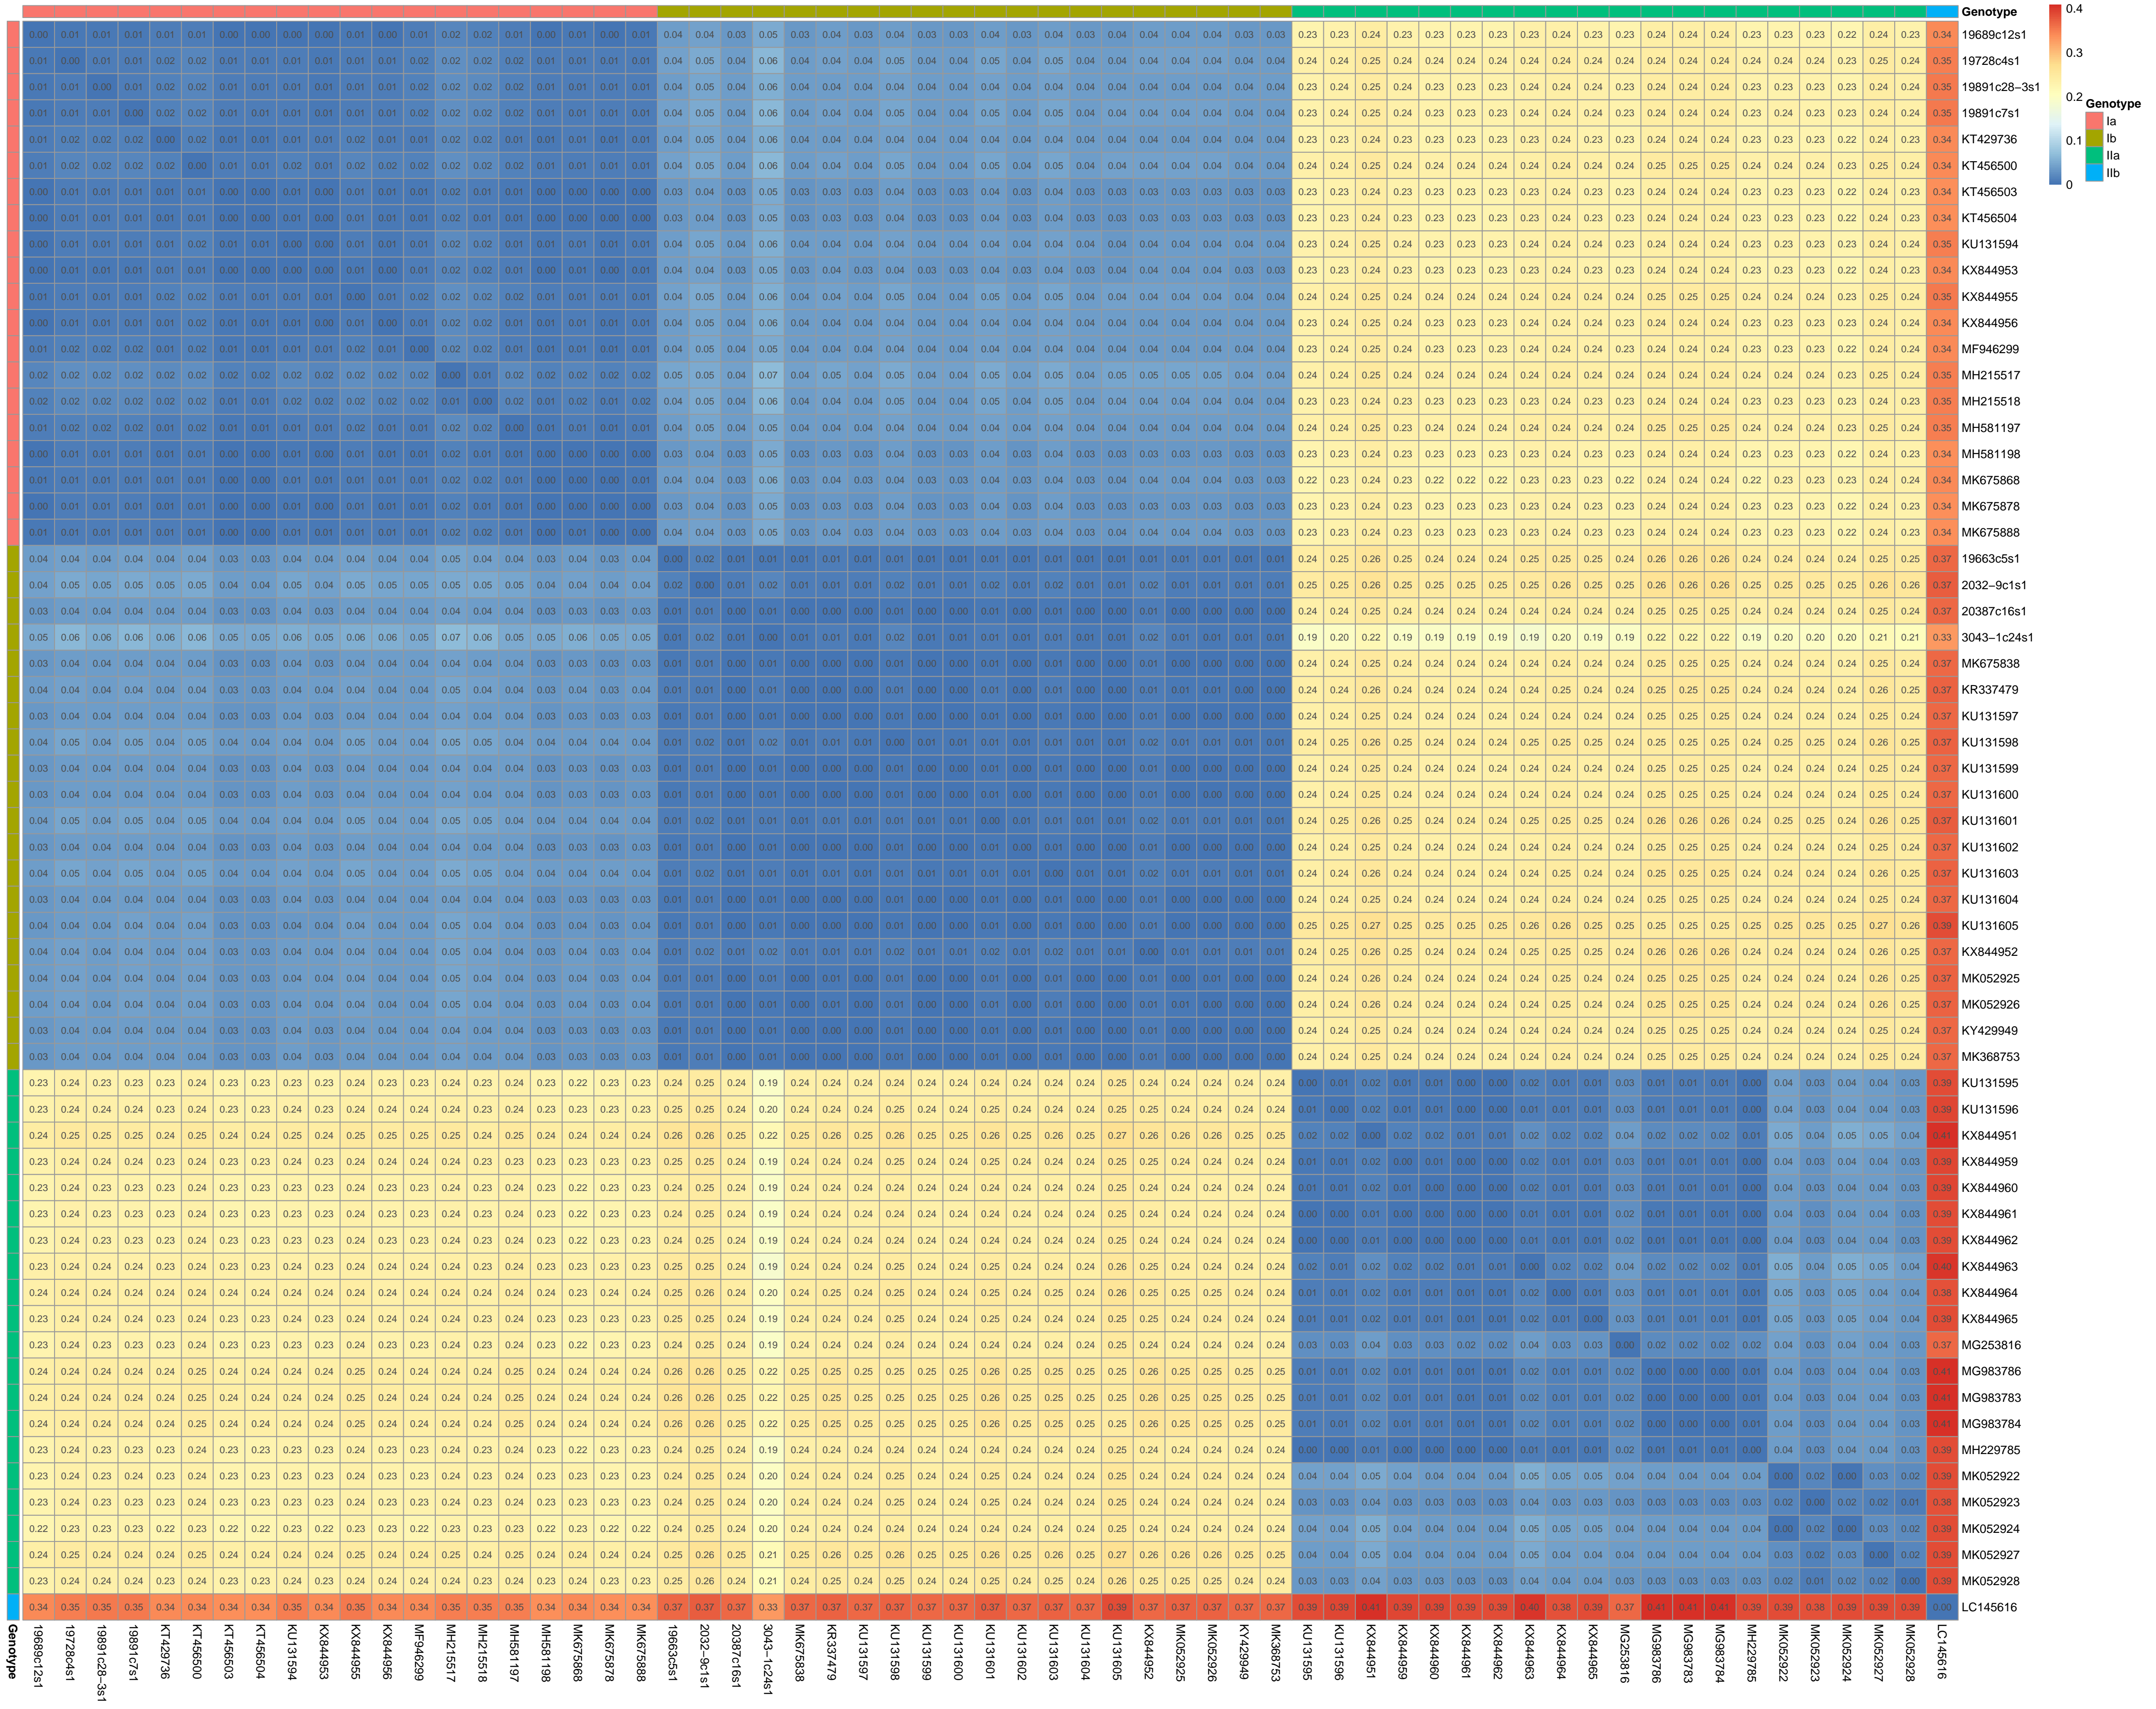

Supplement: s1 [file s1]

L1 segment

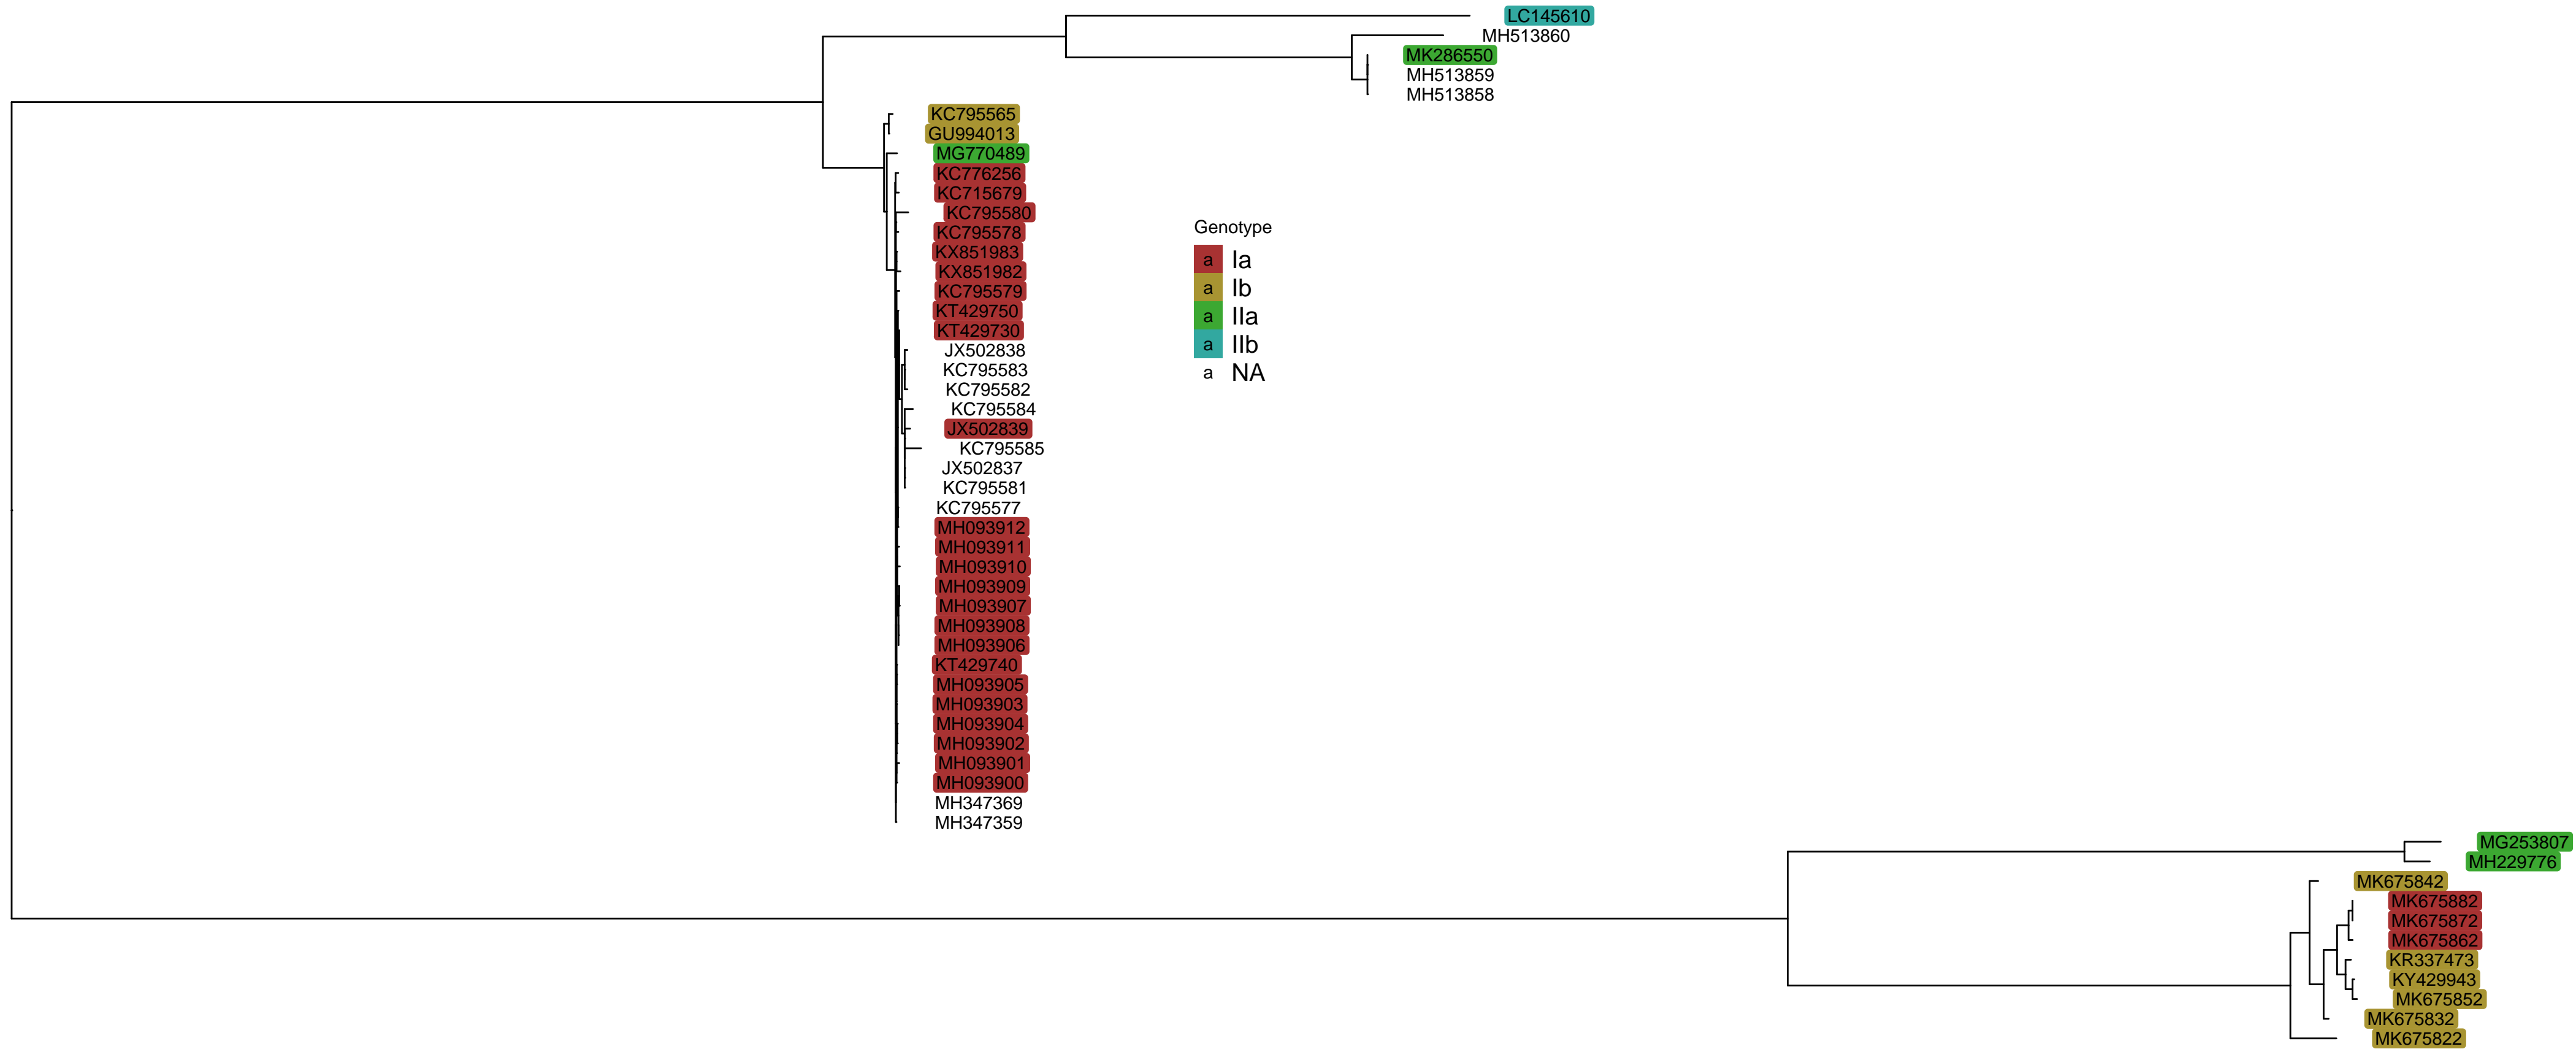

L2 segment

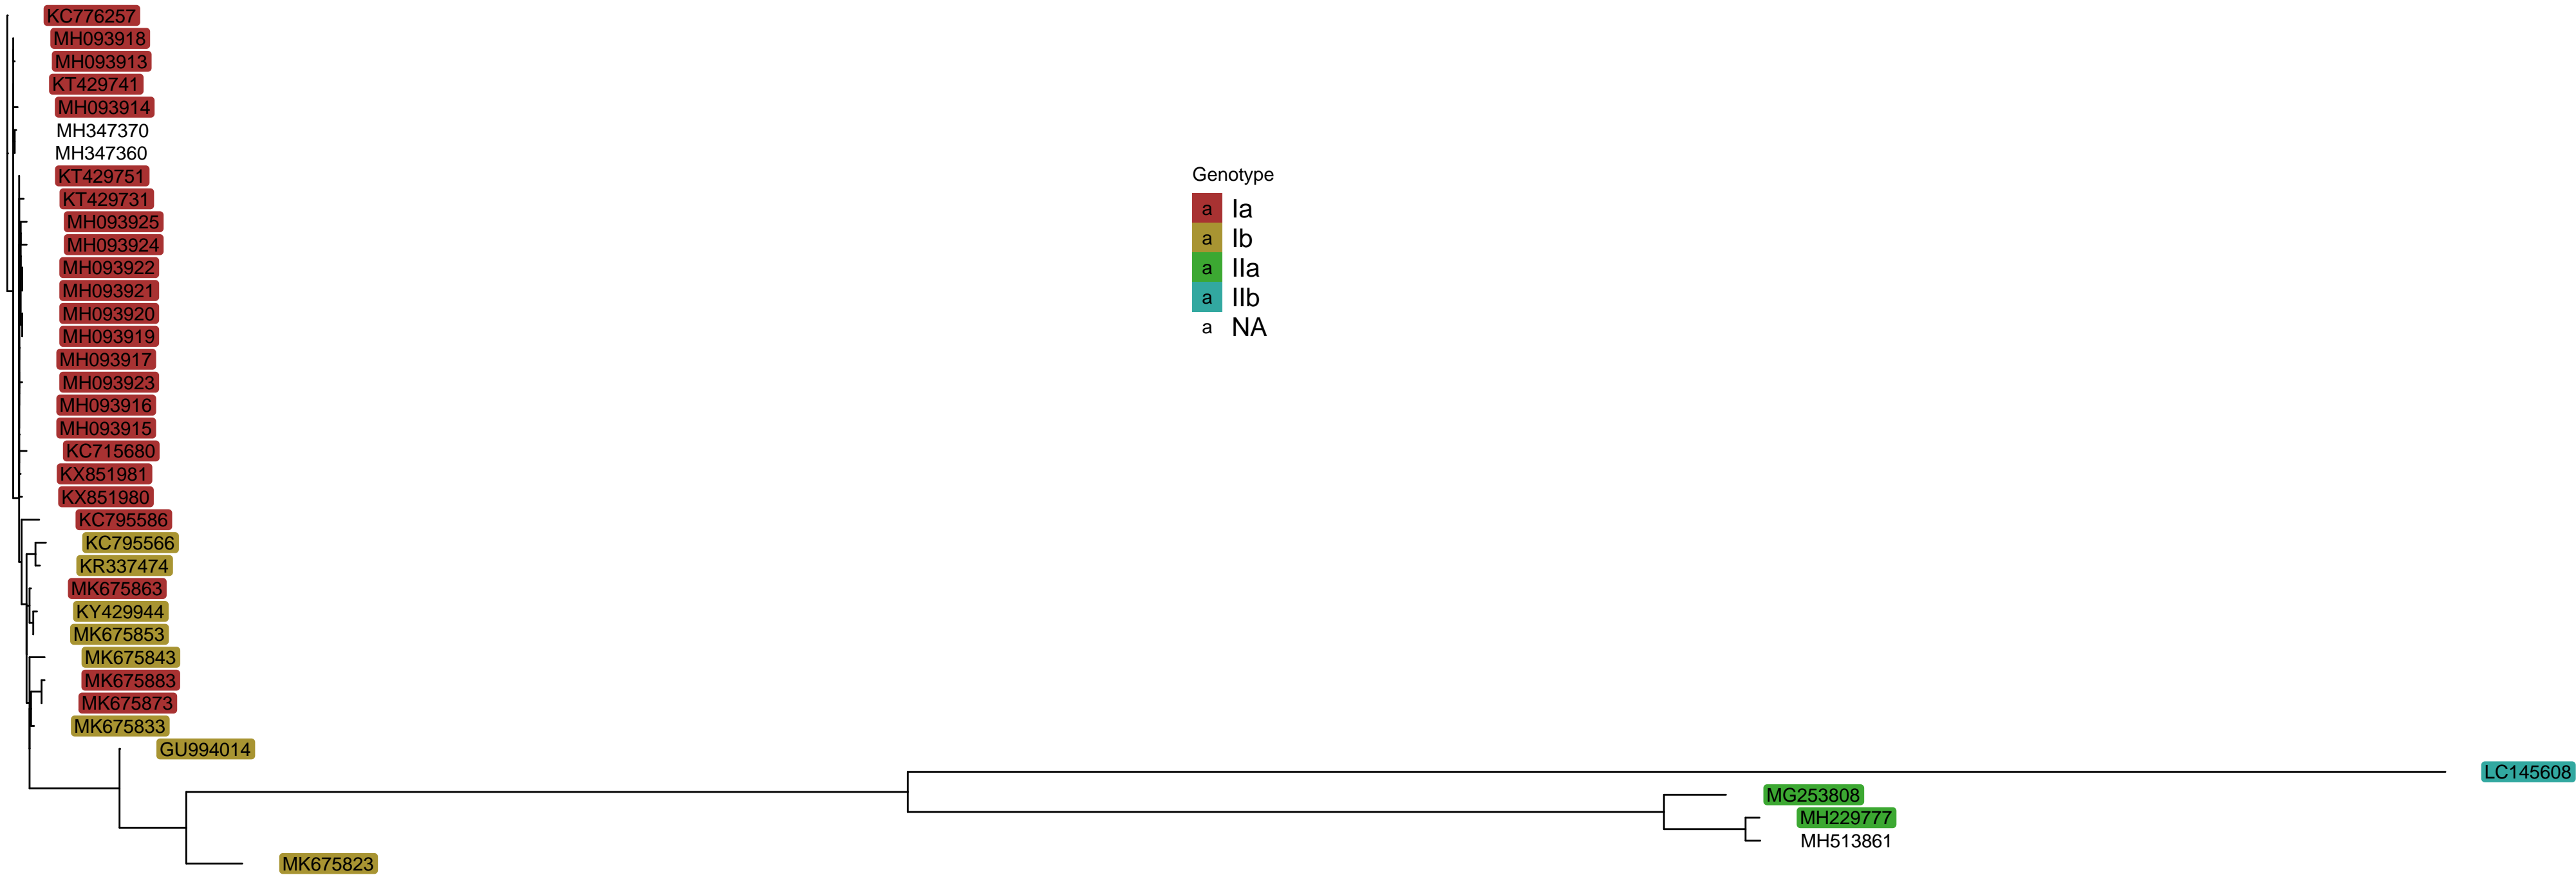

L3 segment

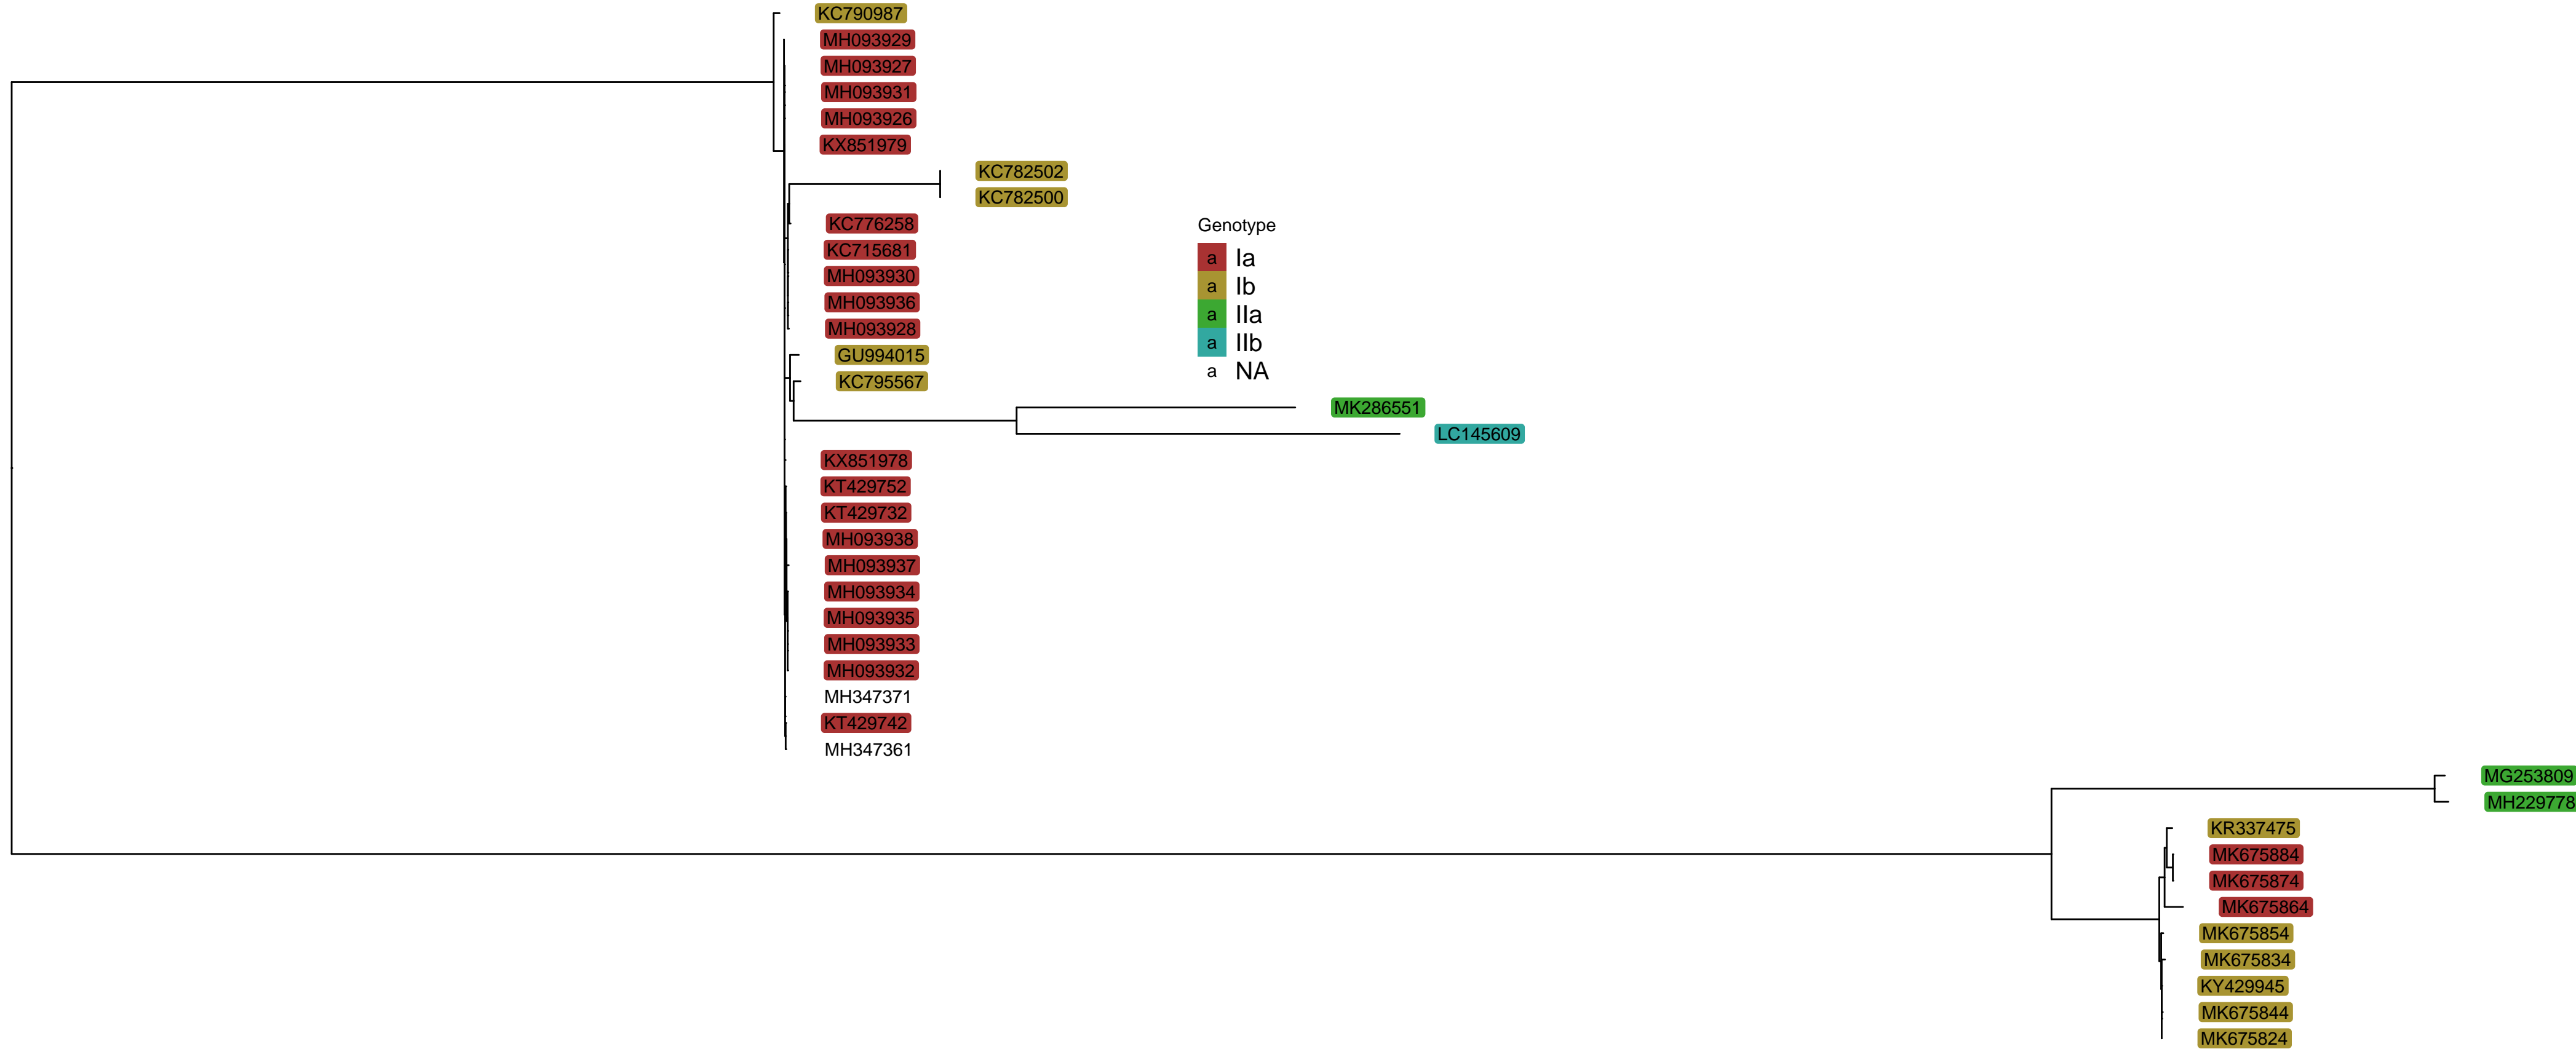

M1 segment

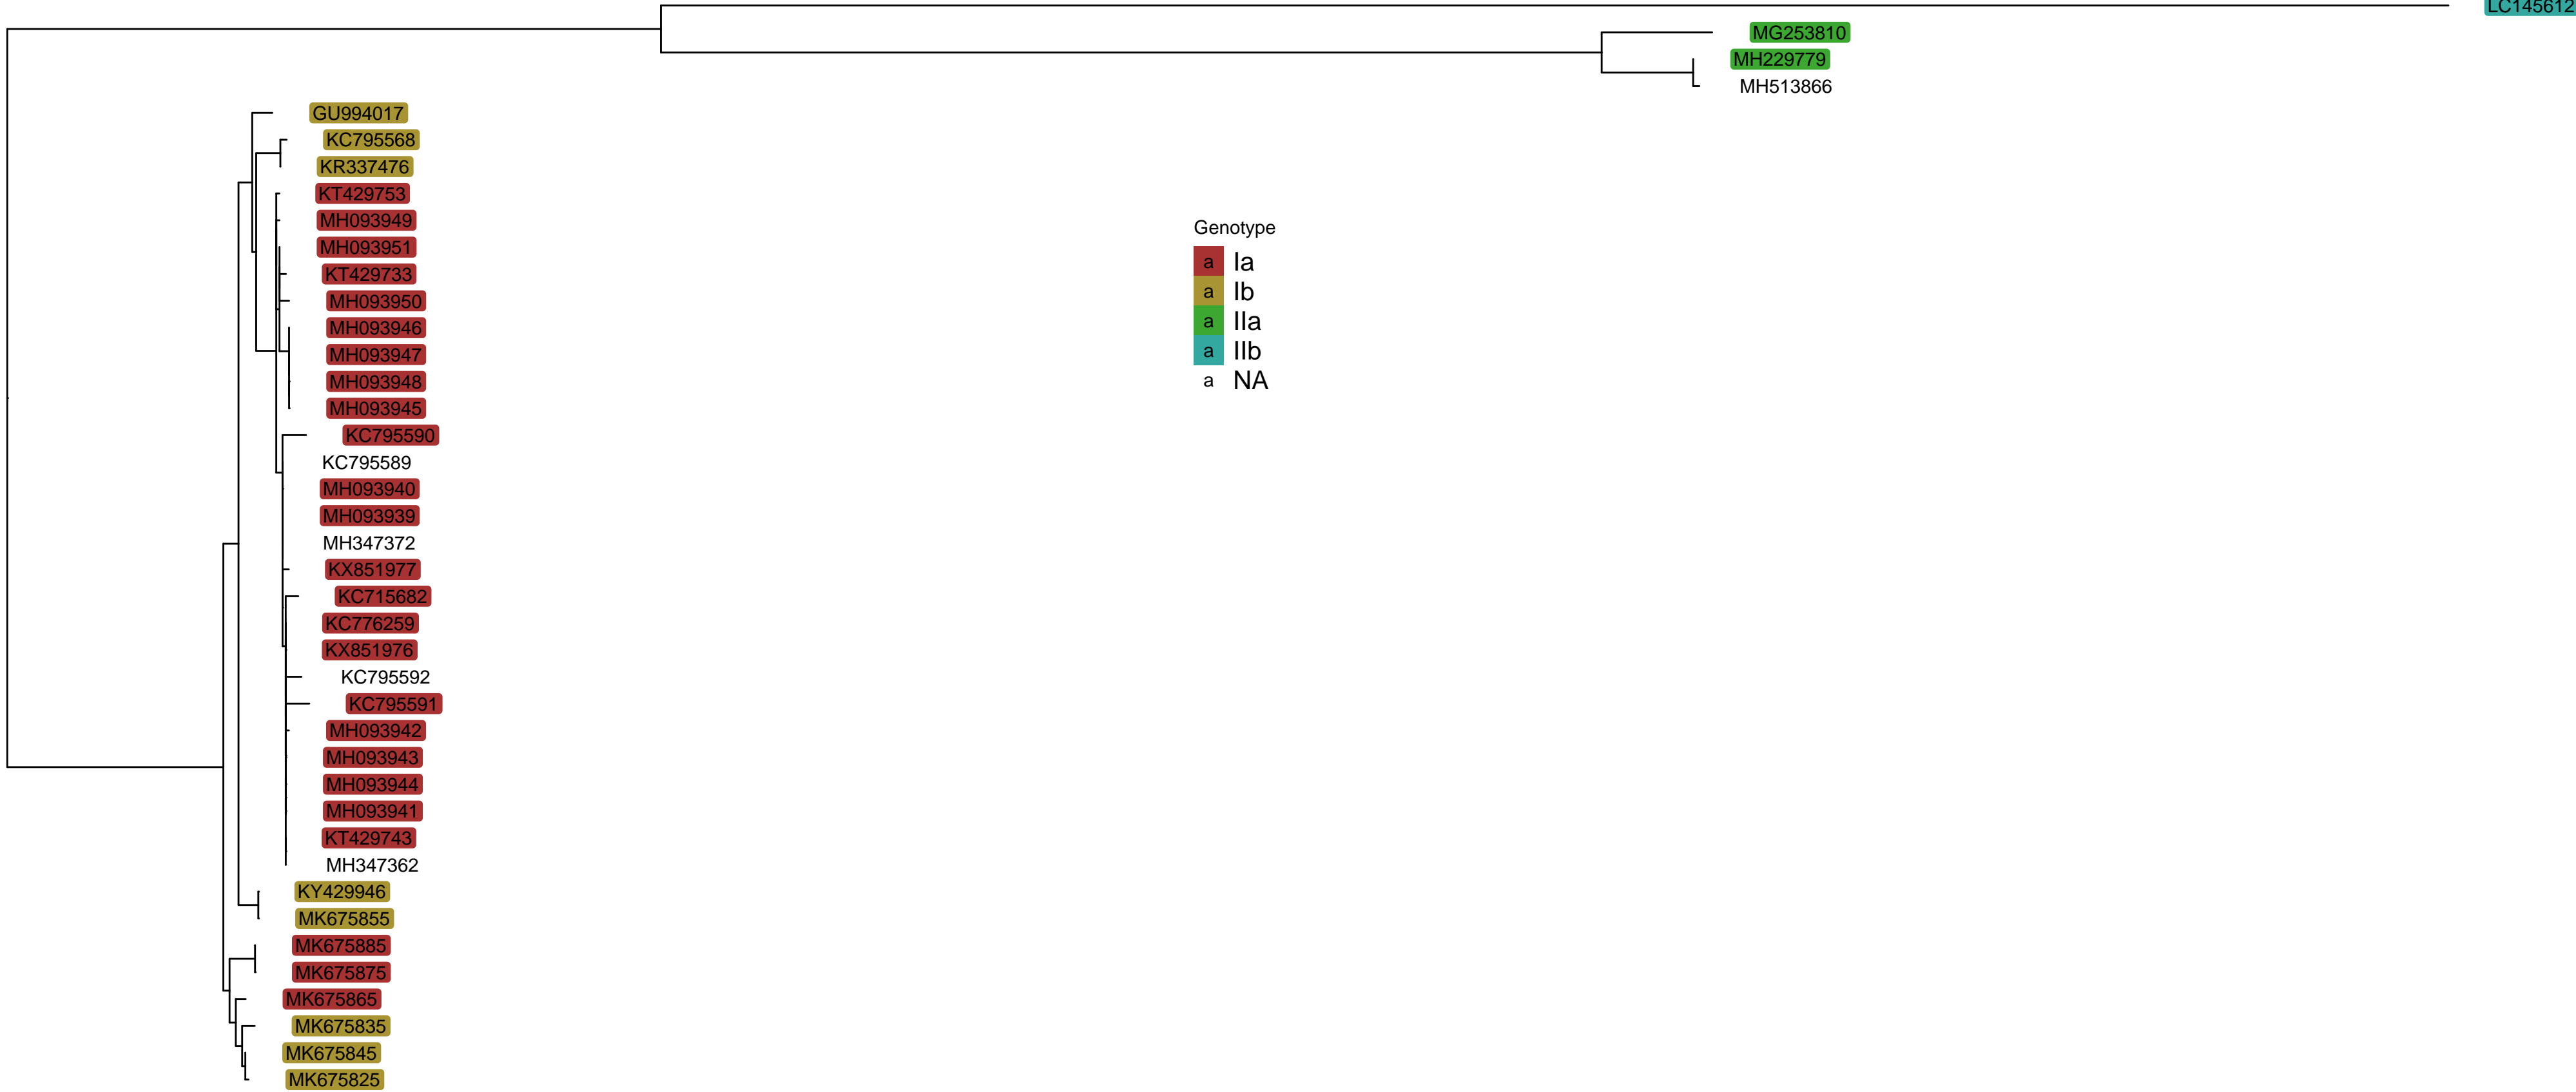

M3 segment

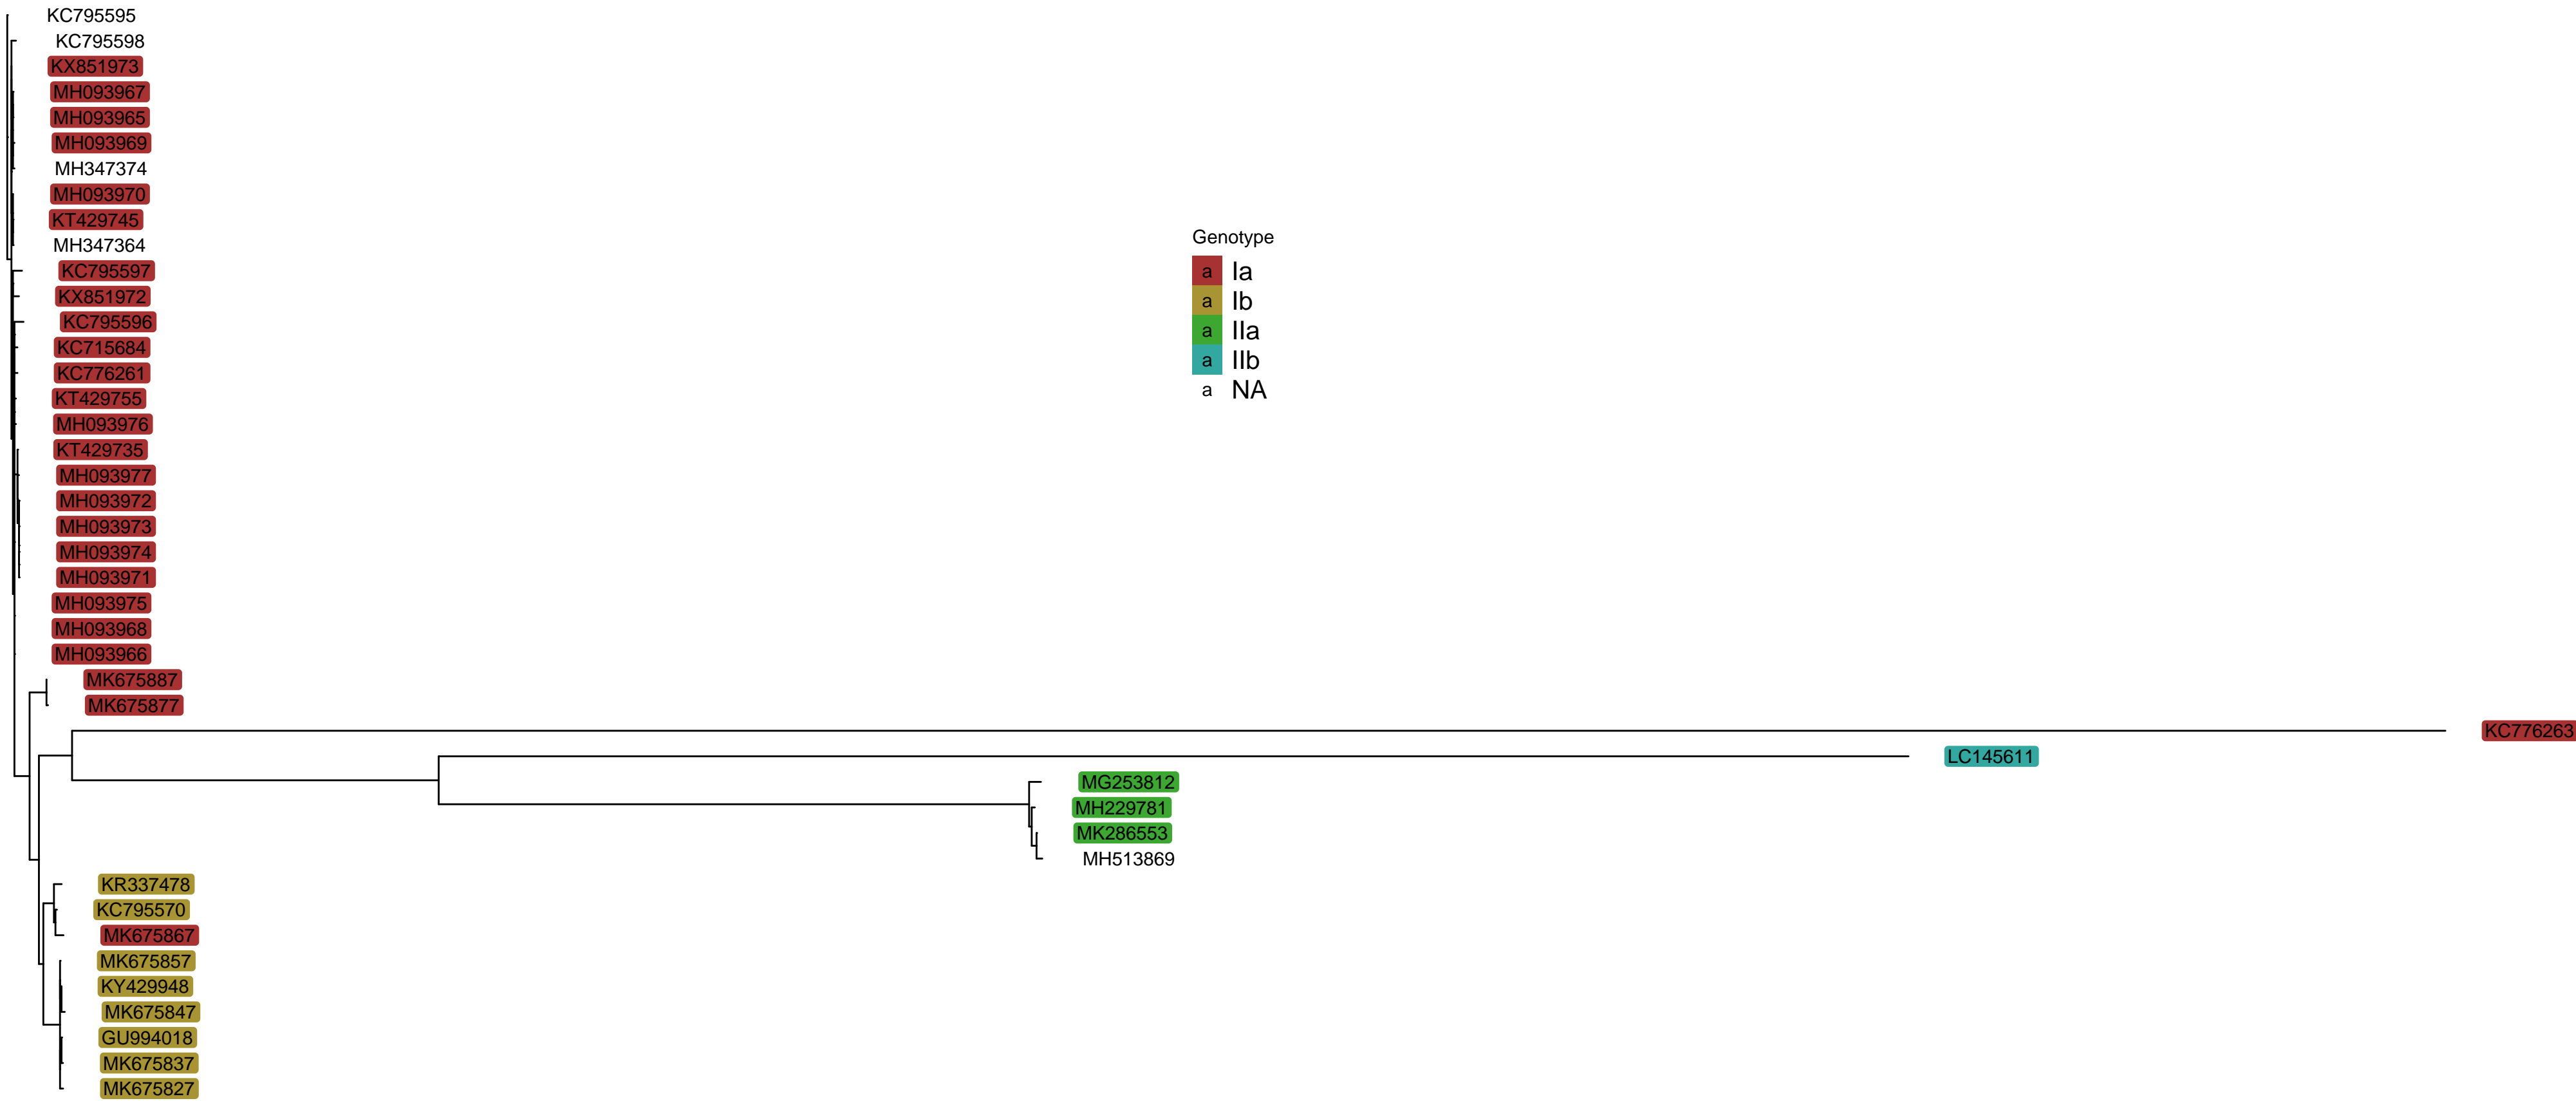

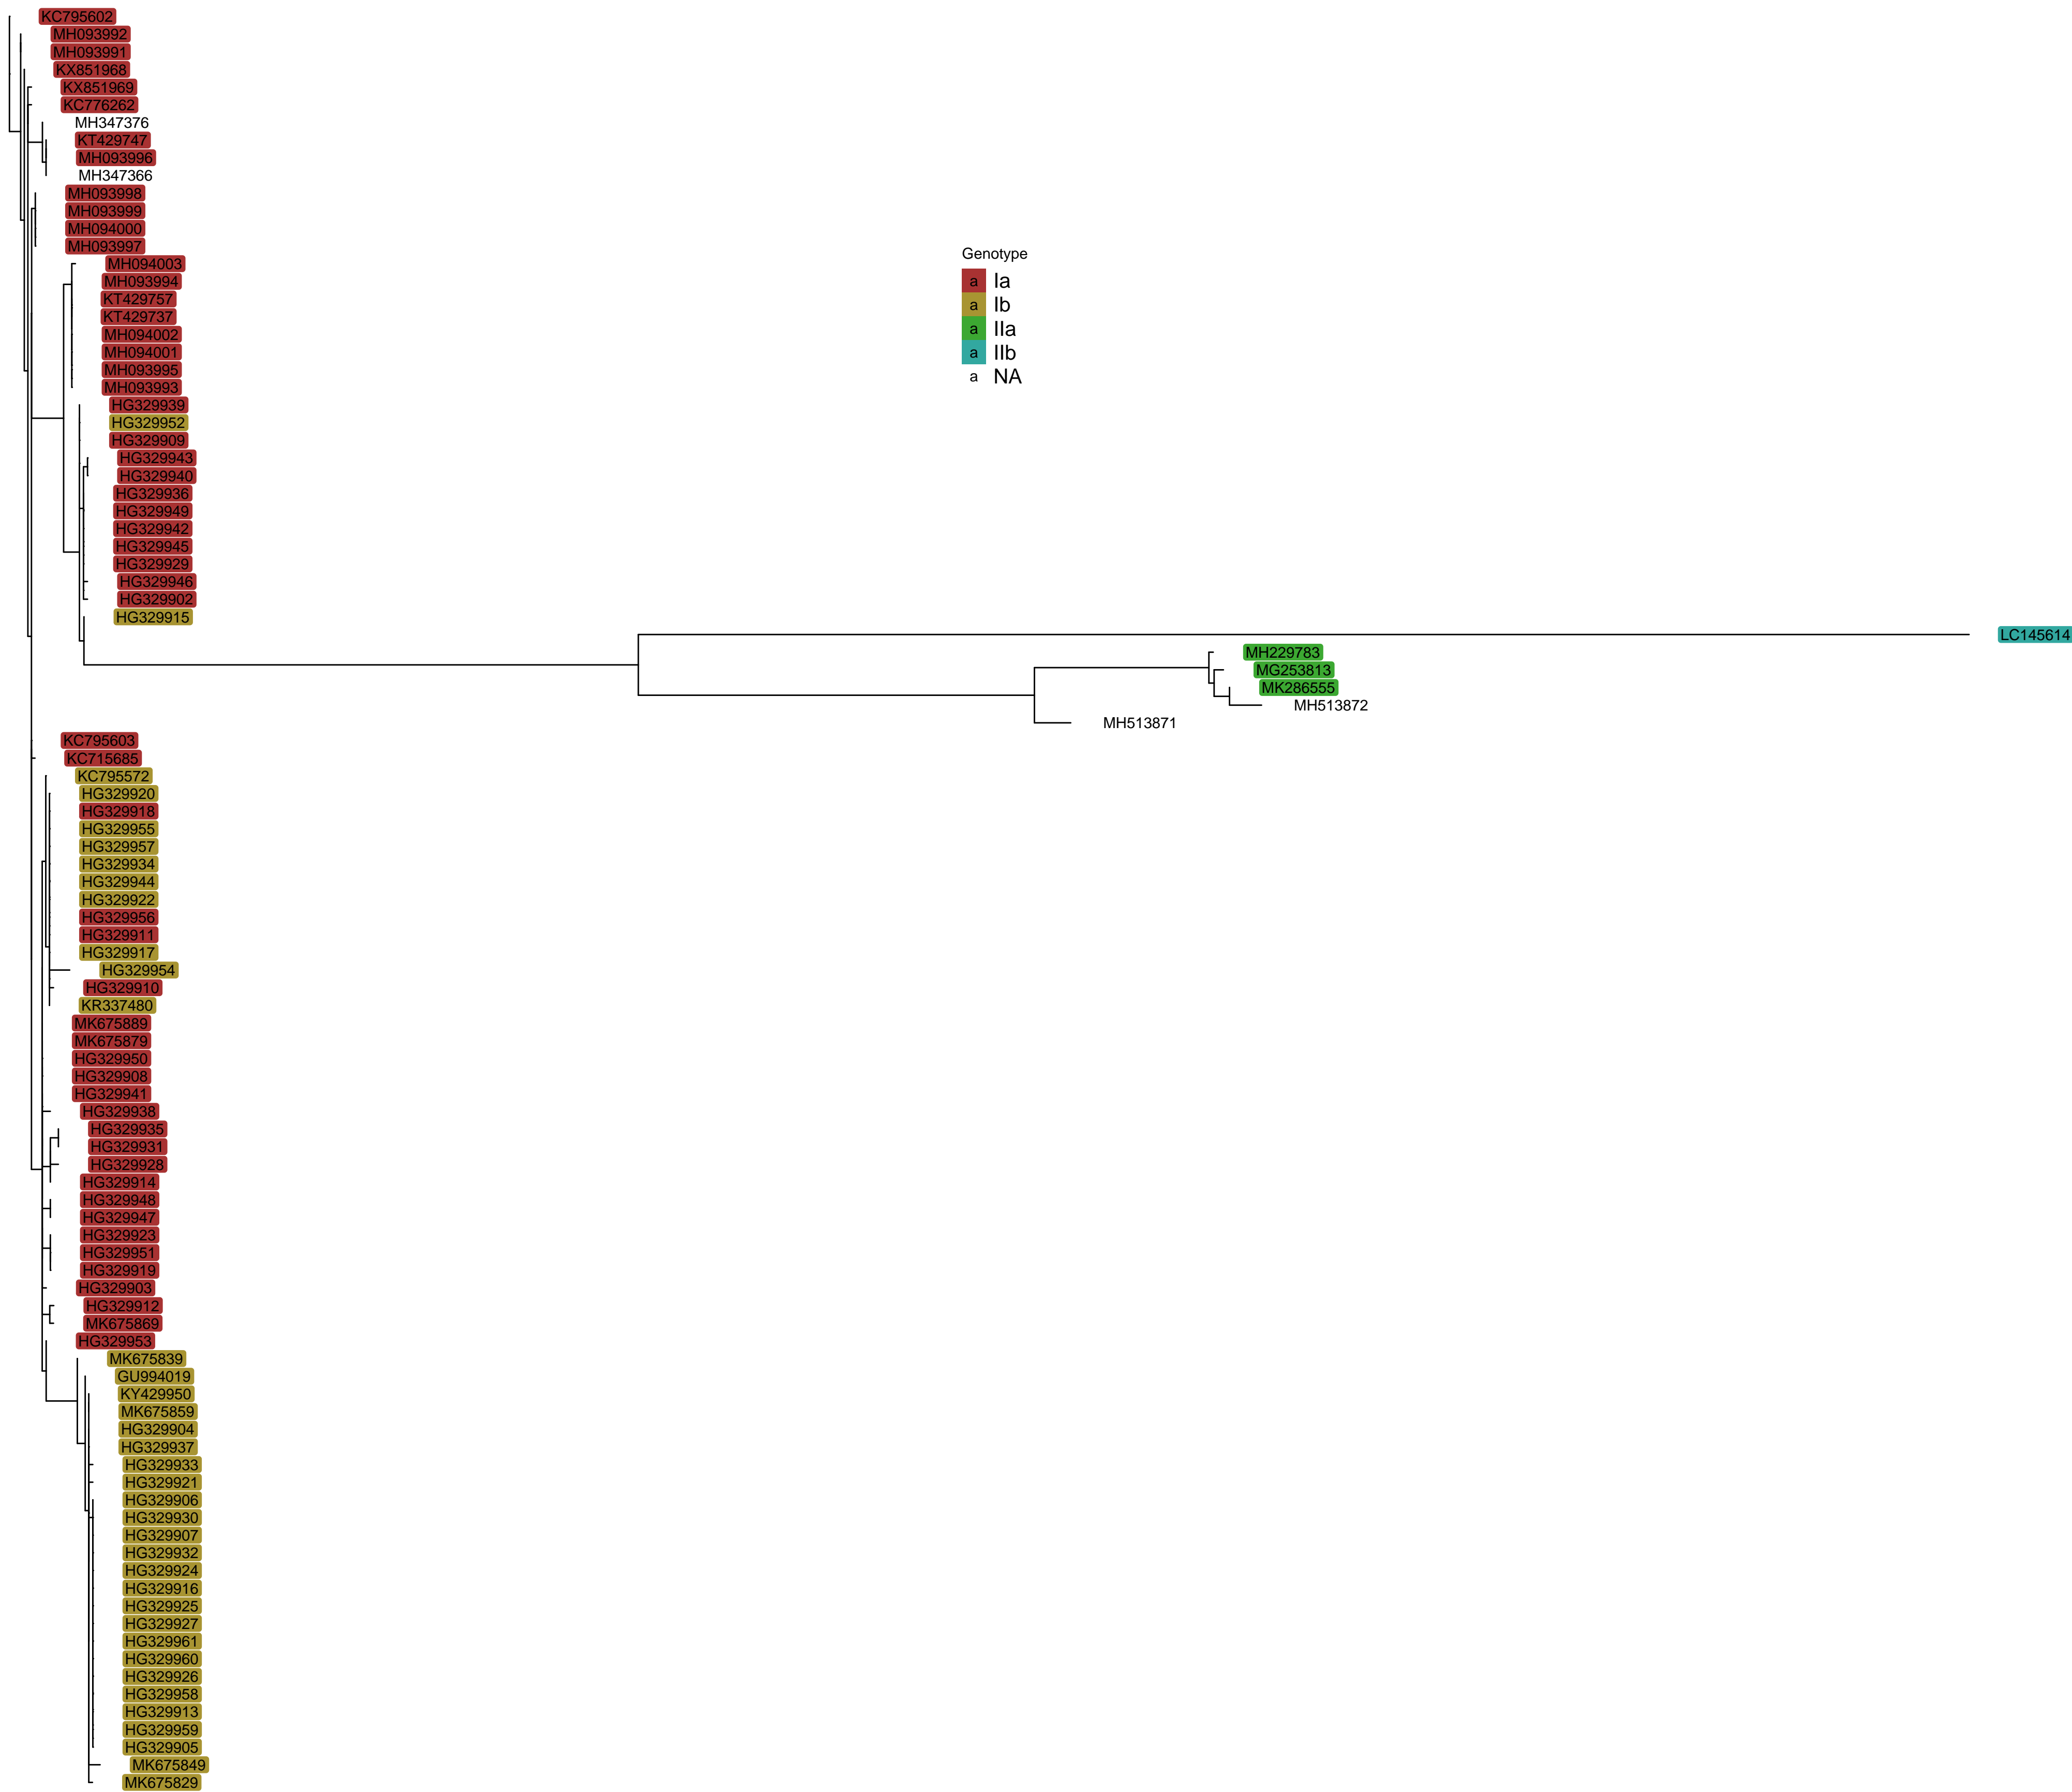

S3 segment

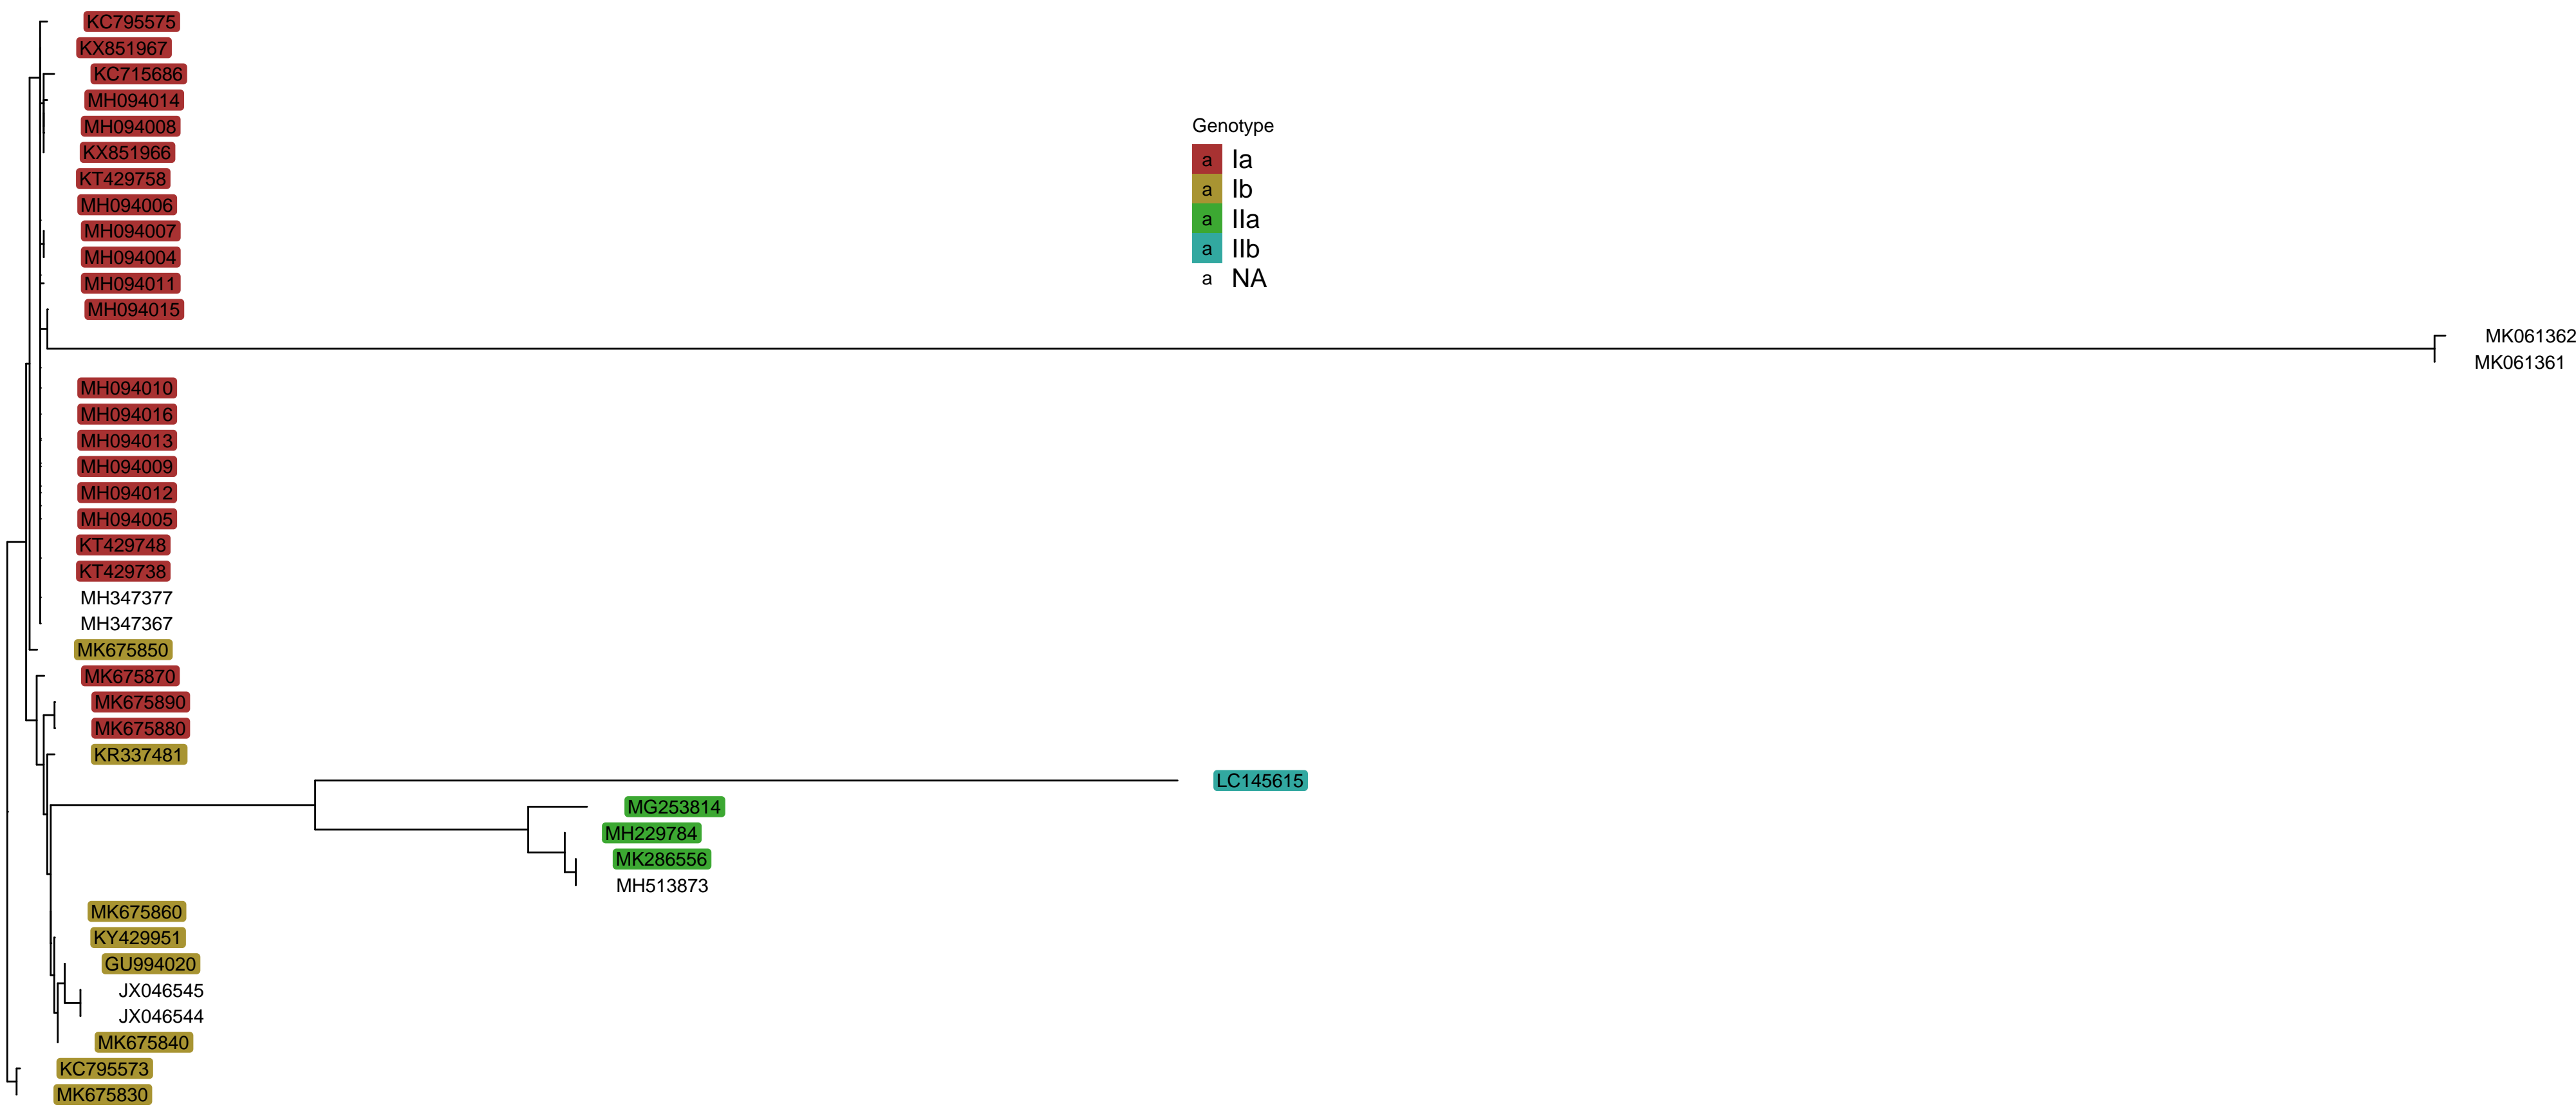

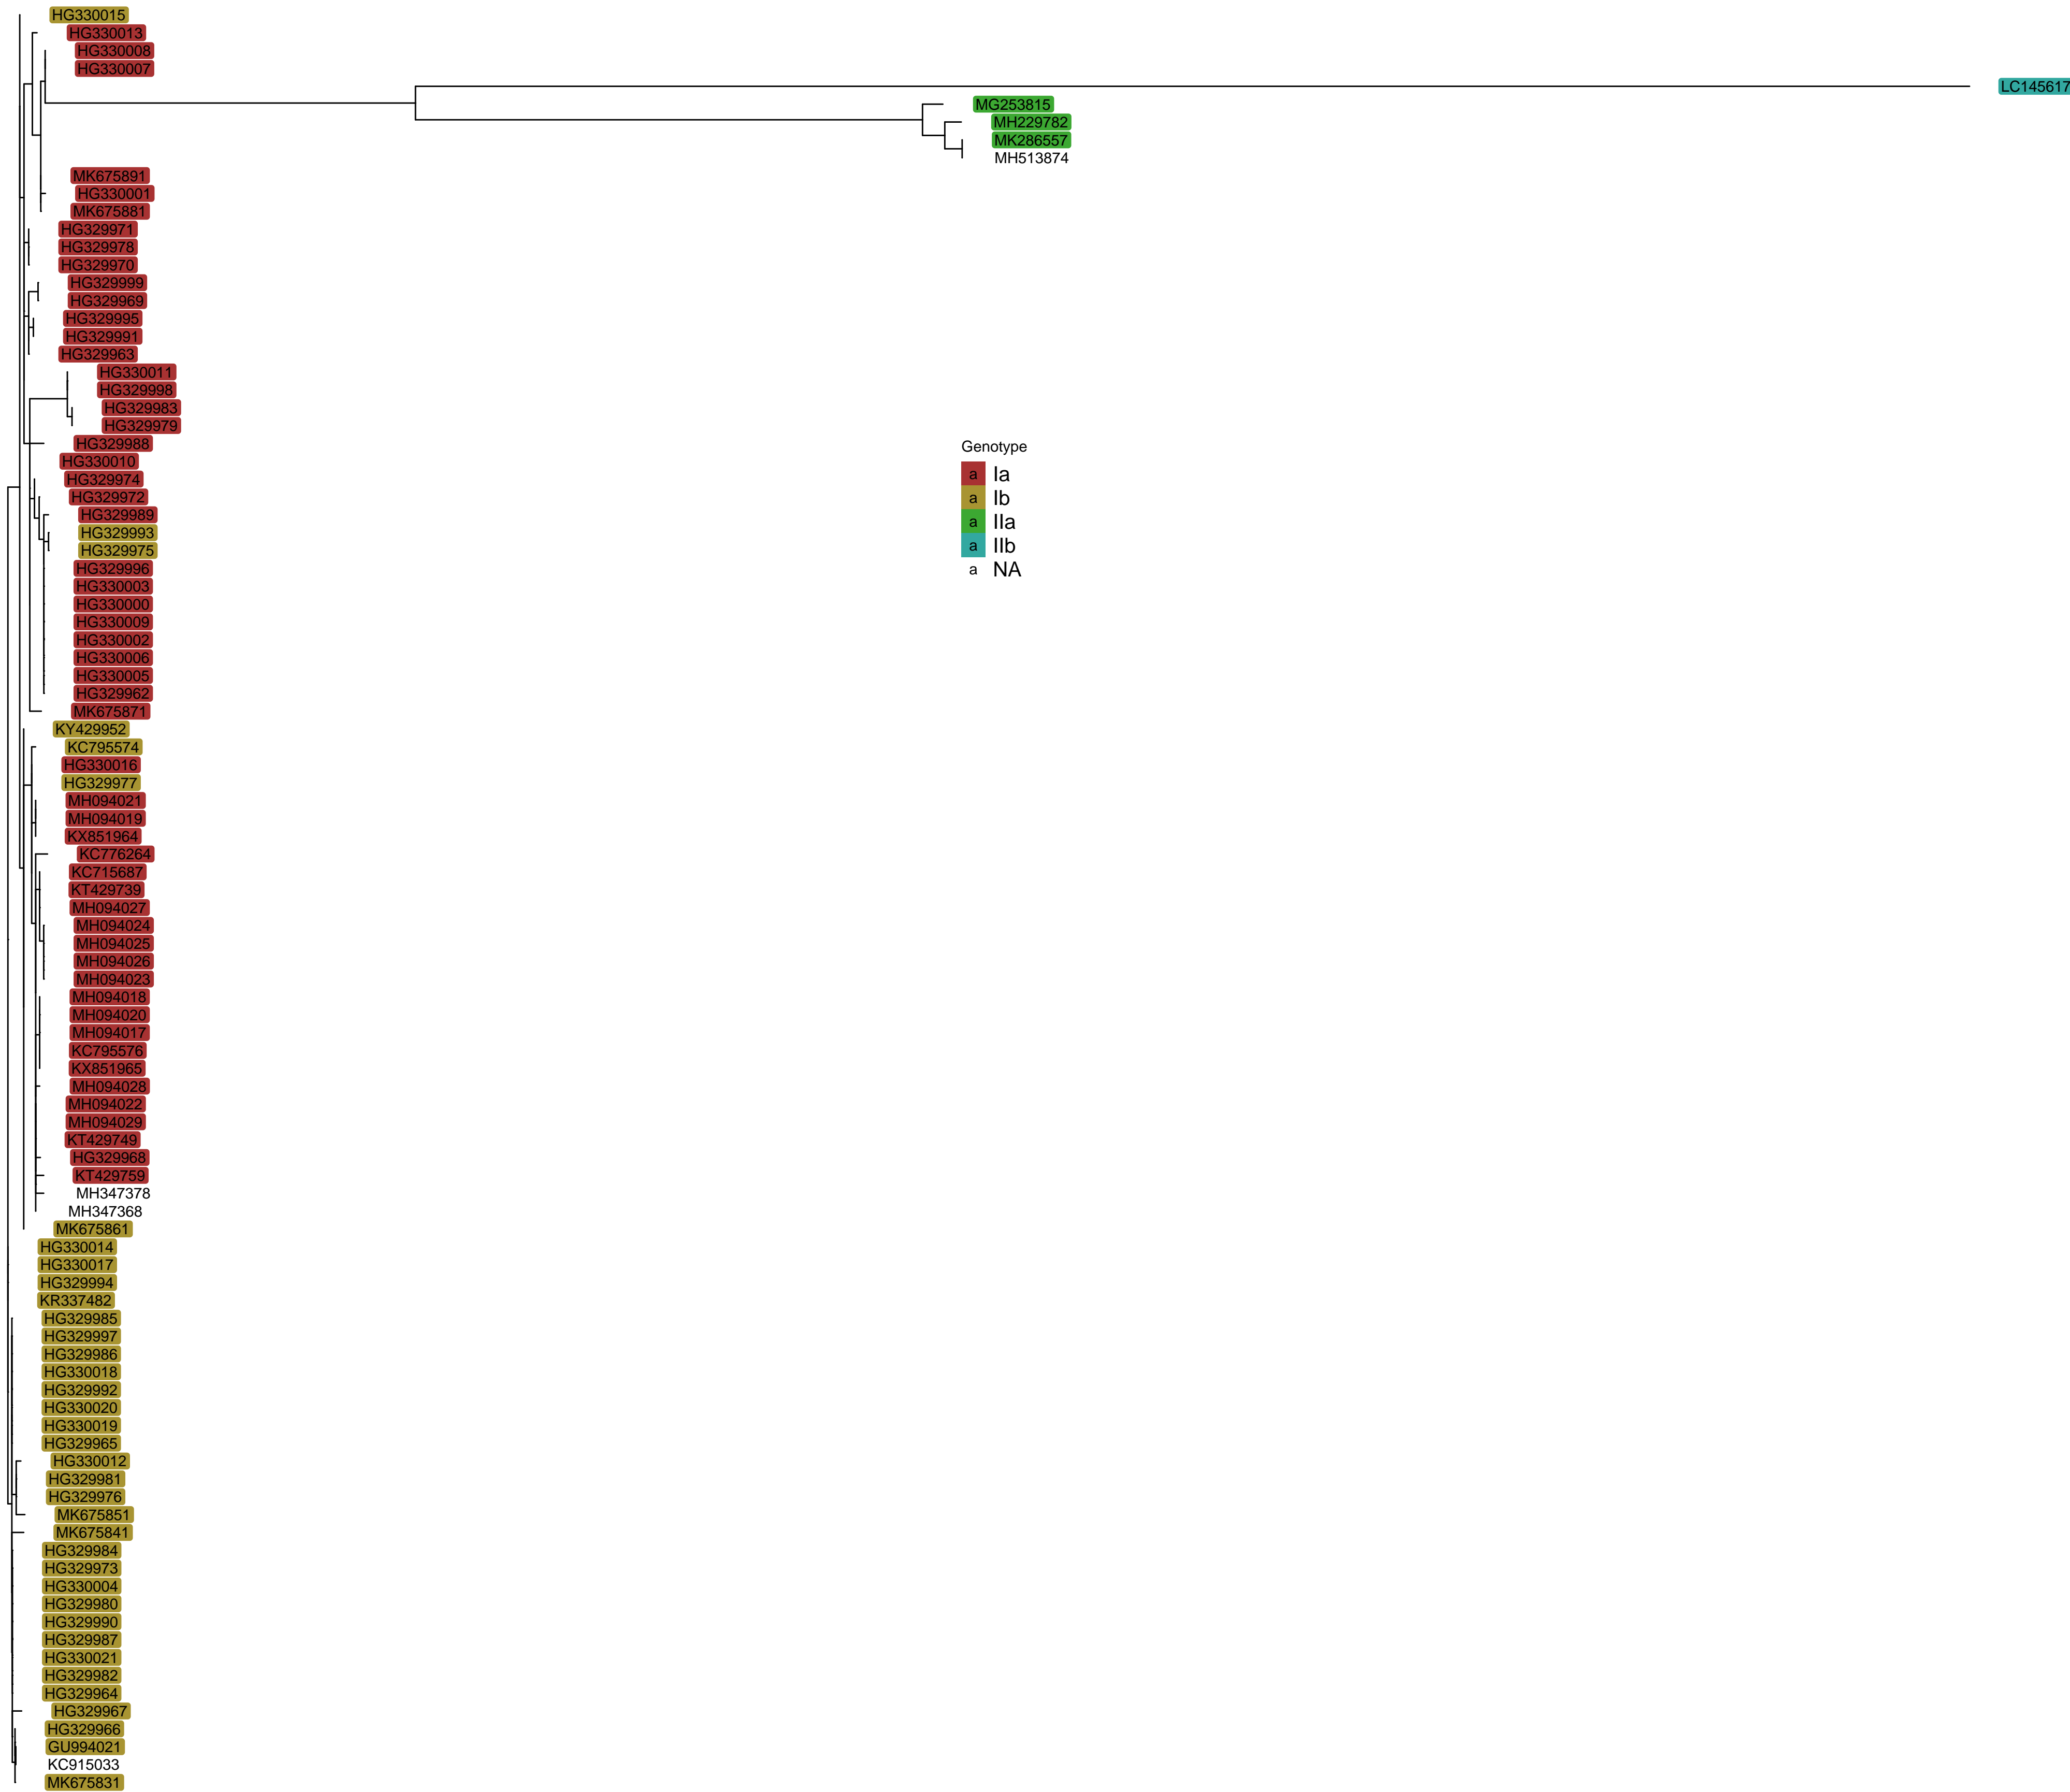

Supplement: s1 [file s1]
